# Supplementary material
Source: publisher site journal article supplement (https://italianbotanist.pensoft.net/article/50032/download/suppl/31/)
Supplement: Supplementary file 1

**Italian Botanist 9**

Supplementary materials to Ballelli et al. 2020, An updated checklist of the vascular flora of Montagna di Torricchio State Nature Reserve (Marche, Italy).

**Supplementary data**

**1.** Study area: location, borders and land use.

**2.** Thermo-pluviometric diagram, based on data from the closest meteorological station (Montecavallo; data source: Regione Marche). A slight drought period usually occurs between the mid-July to August.

**3.** Pictures of the study area and the main vegetation types: **a)** Upper Val di Tazza: secondary grasslands with *Sesleria nitida* Ten., *Bromopsis erecta* (Huds.) Fourr. and *Briza media* L. In the bottom of the valley are shown *Cynosurus cristatus* L. dominated hay meadows; **b)** Lower Val di Tazza: *Ostrya carpinifolia* Scop. forests with *Quercus pubescens* Willd. are widespread up to about 1,000 m a.s.l.; *Fagus sylvatica* L. forests extend over about 1,000 m a.s.l.; **c)** Differences between xeric secondary grassland on the south-facing slope with shallow and rocky soil *vs* more mesic grassland on the north-facing slope; **d)** Shrubland community with *Cytisophyllum sessilifolium* (L.) O.Lang.; **e)** Landscape heteorgeneity on the south-facing slope of the lower Val di Tazza. *Ostrya carpinifolia* Scop. dominated woodlands are interspersed with xeric grasslands and shrublands. On the upper part of the mountain there are some small areas with *Fagus sylvatica* L.

**4.** Checklist of the vascular flora of “Montagna di Torricchio” State Nature Reserve (Marche, Italy).

**5.** Table 1.List of the Italian endemic taxa found in the study area.

**6.** Table 2.Alien species found at Montagna di Torricchio State Nature Reserve (Marche, Italy). The status and associated code in the study area, in Marche and in Italy for alien species follow Galasso et al. (2018). A (archaeophyte), N (neophyte), CAS (casual alien) NAT (naturalized alien) and INV (invasive alien).

**7.** Images of the herbarium specimens kept in CAME of the two species new for Italy: a) *Taraxacum calocarpum* Sonck, b) *Taraxacum pulchrifolium* Markl.

**8.** Life form spectrum.

**9.** Chorological spectrum.

**1**. Study area: location, borders and land use (Author: Marco Tavoloni).


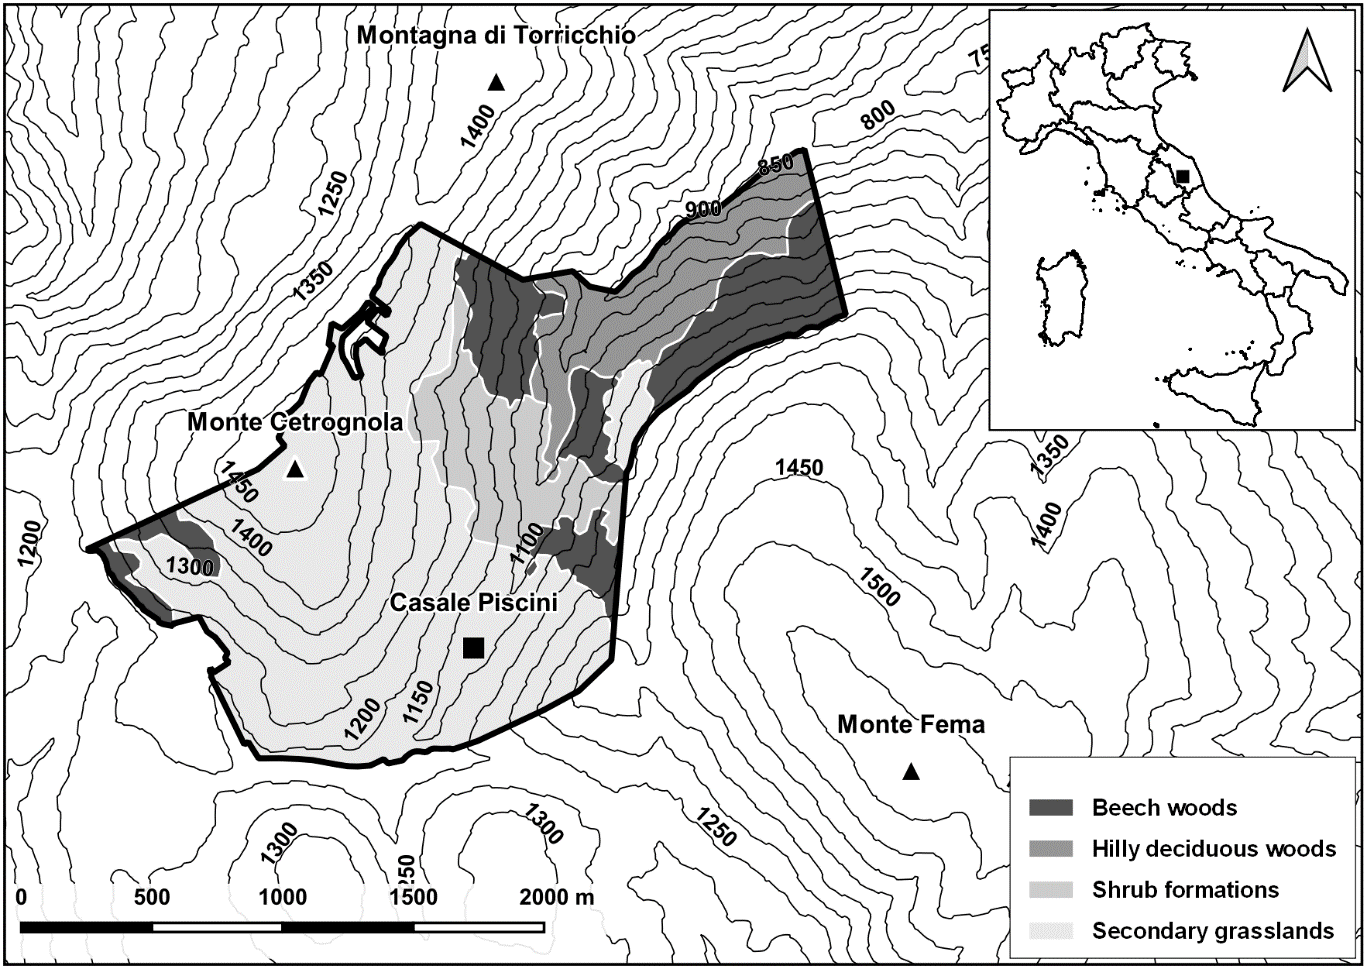


**2.** Thermo-pluviometric diagram, based on data from the closest meteorological station (Montecavallo; data source: Regione Marche). A slight drought period usually occurs between the mid-July to August.


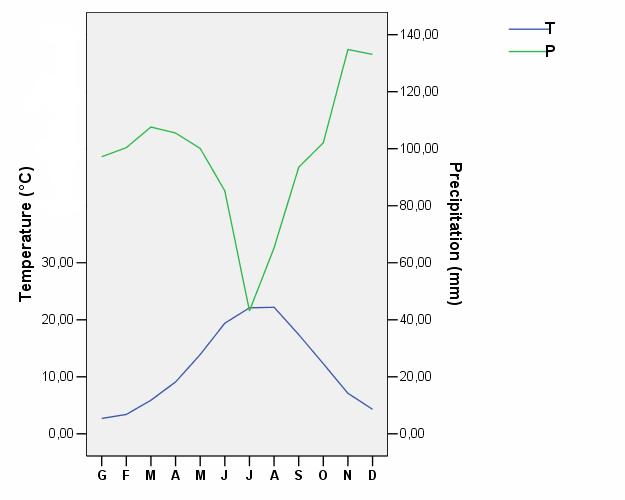


**3.** Pictures of the study area and the main vegetation types.

**a)** Upper Val di Tazza: secondary grasslands with *Sesleria nitida* Ten., *Bromopsis erecta* (Huds.) Fourr. and *Briza media* L. In the bottom of the valley are shown *Cynosurus cristatus* L. dominated hay meadows.


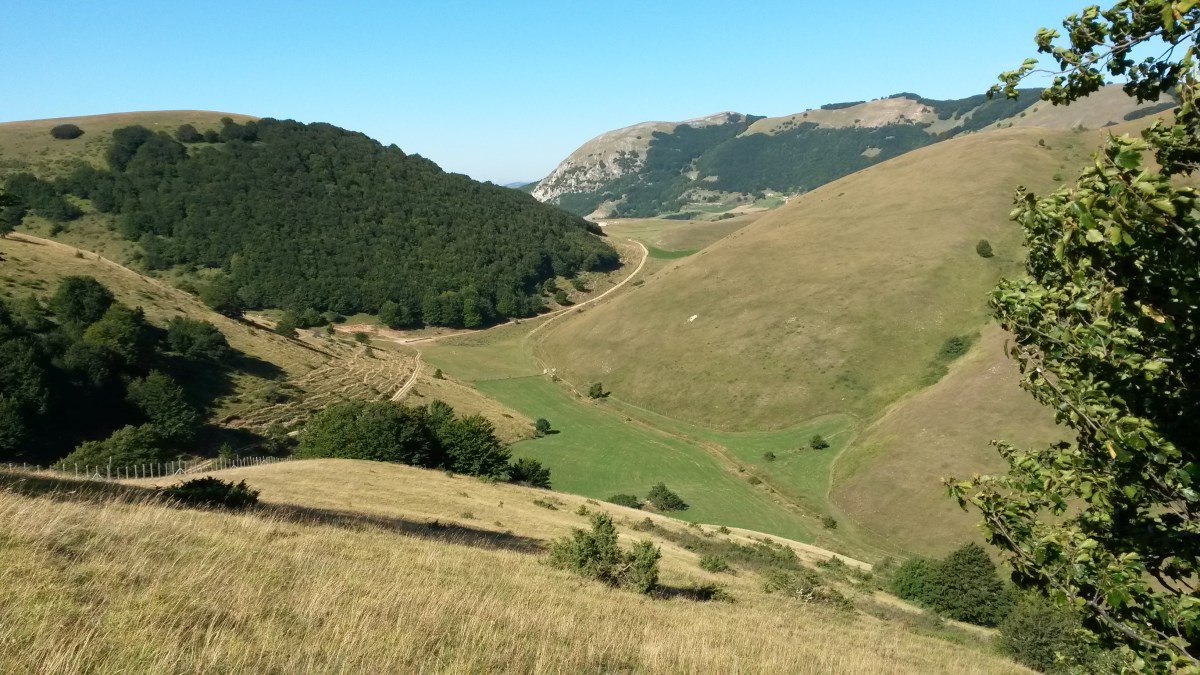


**b)** Lower Val di Tazza: *Ostrya carpinifolia* Scop. forests with *Quercus pubescens* Willd. are widespread up to about 1,000 m a.s.l.; *Fagus sylvatica* L. forests extend over about 1,000 m a.s.l.


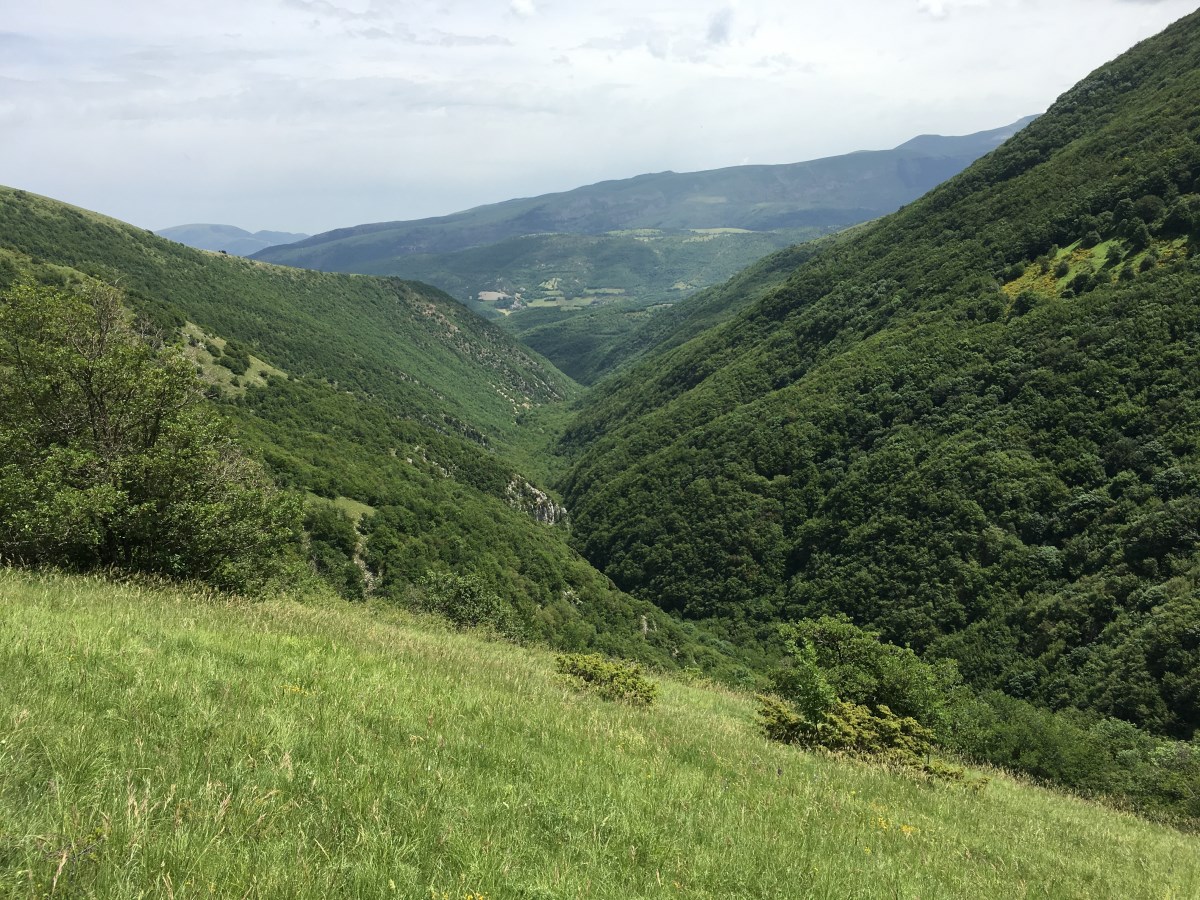


**c)** Differences between xeric secondary grassland on the south-facing slope with shallow and rocky soil *vs* more mesic grassland on the north-facing slope.


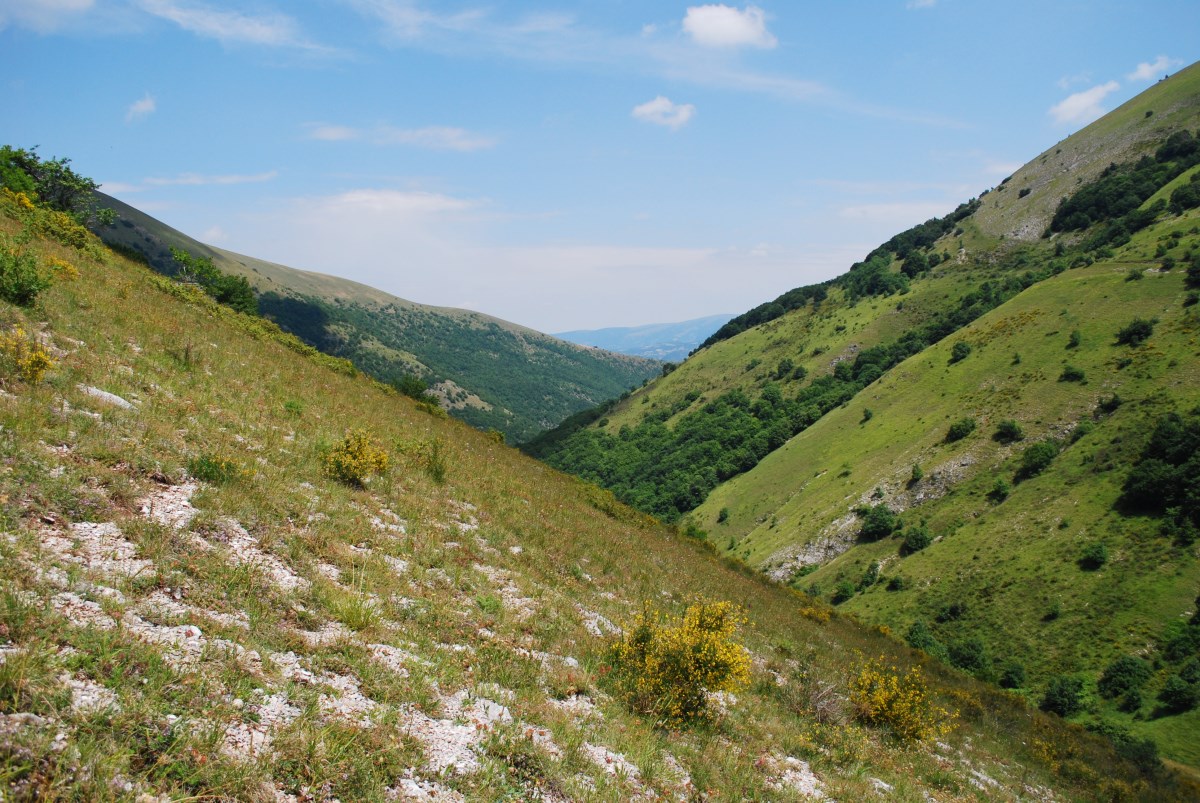


**d)** Shrubland community with *Cytisophyllum sessilifolium* (L.) O.Lang.


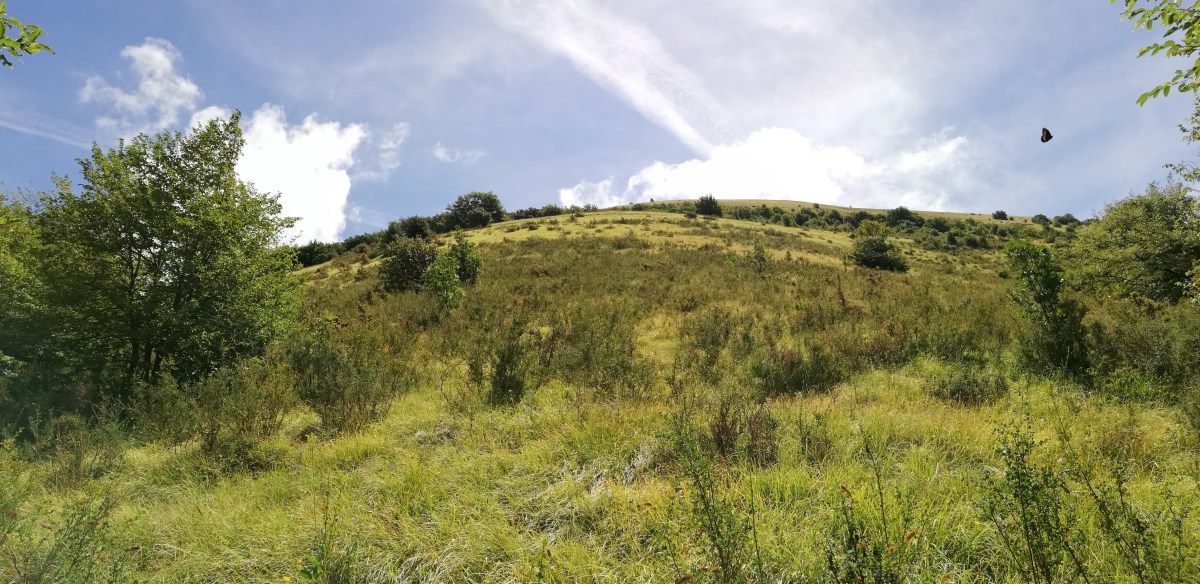


**e)** Landscape heterogeneity on the south-facing slope of the lower Val di Tazza. *Ostrya carpinifolia* Scop. dominated woodlands are interspersed with xeric grasslands and shrublands. On the upper part of the mountain there are some *Fagus sylvatica* L. copses.


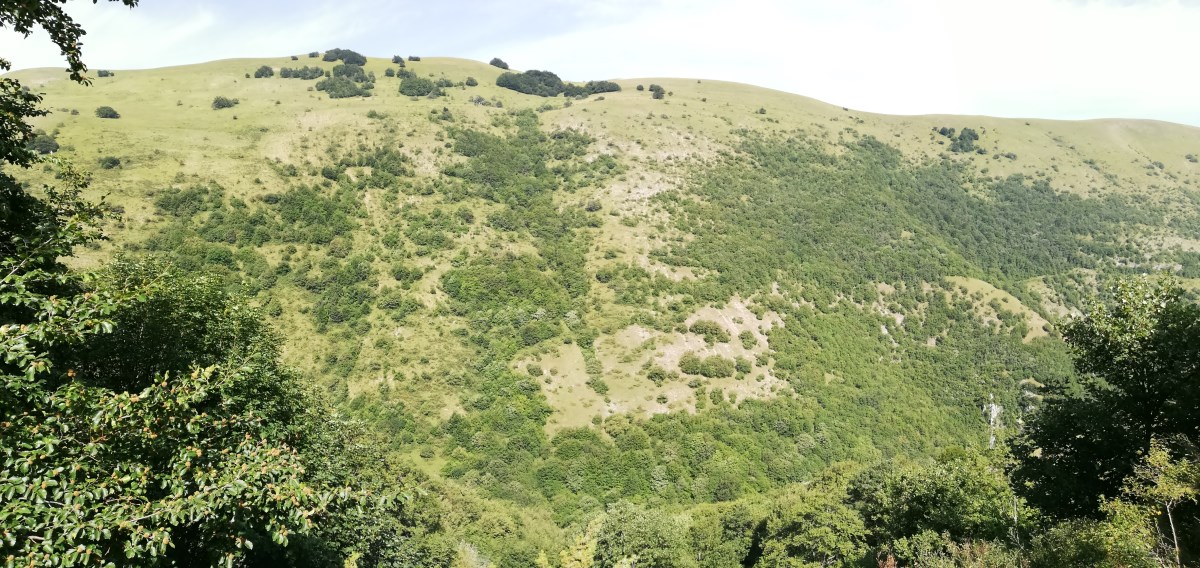


**4.** Checklist of the vascular flora of “Montagna di Torricchio” State Nature Reserve (Marche, Italy).

The systematic order of the families follows Bartolucci et al. (2018) and Galasso et al. (2018). Taxa are ordered alphabetically within each family. For each taxon the following information is reported: accepted name, endemic, cryptogenic and/or alien status, conservation status, life form and chorology.

Abbreviations or symbols used in the floristic list are:

**E** Italian endemic (Peruzzi et al. 2014, 2015; Bartolucci et al. 2018)

**A** Alien taxa: [CAS (occurring as a casual alien in the studied area), NAT (occurring as a naturalized alien in the studied area), INV (occurring as an invasive alien in the studied area)]

**C** Cryptogenic (doubtfully native taxon, whose origin of occurrence in Italy is unknown)

* new record for the study area

** new record for Marche regional flora

*** new record for Italy

**#** confirmed for Marche regional flora

**Ferns and fern allies**

Equisetaceae

****Equisetum ramosissimum*** Desf. – G rhiz – Cosmopol.

Aspleniaceae

***Asplenium adiantum-nigrum*** L. subsp. ***adiantum-nigrum*** – H ros – Cosmopol.

***Asplenium ceterach*** L. subsp. ***ceterach*** – H ros – S Europ./W Asiat.

****Asplenium onopteris*** L. – H ros – Medit.

***Asplenium ruta-muraria*** L. subsp. ***ruta-muraria*** – H ros – Eurasiat./N Amer./Austral.

***Asplenium scolopendrium*** L. subsp. ***scolopendrium*** – H ros – Eurasiat.

***Asplenium trichomanes*** L. subsp. ***quadrivalens*** D.E.Mey. – H ros – Eurasiat./N Amer./Austral.

Cystopteridaceae

***Cystopteris fragilis*** (L.) Bernh. – H caesp – Cosmopol.

Dennstaedtiaceae

***Pteridium aquilinum*** (L.) Kuhn subsp. ***aquilinum*** – G rhiz – Cosmopol.

Dryopteridaceae

***Dryopteris filix-mas*** (L.) Schott – G rhiz – Eurasiat./Amer.

***Polystichum aculeatum*** (L.) Roth – G rhiz – Eurosib.

***Polystichum setiferum*** (Forssk.) T.Moore exWoyn. – G rhiz – S Europ.

Polypodiaceae

***Polypodium interjectum*** Shivas – H ros – W Europ./Medit.

Note: this species was recorded by Ballelli and Francalancia (1982) under the name *Polypodium australe.*

***Polypodium vulgare*** L. – H ros – Eurosib.

**Gymnosperms**

Cupressaceae

***Juniperus communis*** L. – P caesp – Eurasiat./N Amer.

***Juniperus deltoides*** R.P.Adams – P caesp – Medit.

Note: this species was recorded by Ballelli and Francalancia (1982) under the name *Juniperus oxycedrus* subsp. *oxycedrus*.

Pinaceae

A CAS****Pinus******nigra***J.F.Arnold subsp. ***nigra*** – P caesp – S Europ. mont.

A CAS *****Pinus sylvestris*** L. – P caesp – Eurosib.

Taxaceae

***Taxus baccata*** L. – P scap – Europ./SW Asiat.

**Angiosperms**

Araceae

***Arum maculatum*** L. – G rhiz – Europ.

Dioscoreaceae

***Dioscorea communis*** (L.) Caddick &Wilkin – G rad – W Europ./Medit.

Colchicaceae

***Colchicum lusitanum*** Brot. – G bulb – Medit. mont.

Conservation status: LC (Least concern) (Orsenigo et al. 2020).

Liliaceae

***Fritillaria montana*** Hoppe ex W.D.J.Koch – G bulb – SE Europ. mont./W Asiat.

Conservation status: NT (Near Threatened) (Rossi et al. 2013).

***Gagea lutea*** (L.) Ker Gawl. – G bulb – Eurasiat.

***Gagea pratensis*** (Pers.) Dumort. – G bulb – Europ./N Afr.

***Gagea villosa*** (M.Bieb.) Sweet – G bulb – Medit.

***Lilium bulbiferum*** L. subsp. ***croceum*** (Chaix) Jan – G bulb – S Europ. mont.

***Lilium martagon*** L. – G bulb – Eurasiat.

Orchidaceae

***Anacamptis morio*** (L.) R.M.Bateman, Pridgeon &M.W.Chase – G bulb – Europ.

***Anacamptis pyramidalis*** (L.) Rich. – G bulb – W Europ./Medit.

***Cephalanthera damasonium*** (Mill.) Druce – G rhiz – Europ.

***Cephalanthera longifolia*** (L.) Fritsch – G rhiz – Eurasiat.

***Cephalanthera rubra*** (L.) Rich. – G rhiz – Europ./W Asiat.

***Coeloglossum viride*** (L.) Hartm. – G bulb – Eurosib./N Amer.

***Dactylorhiza maculata*** (L.) Soó subsp. ***f******uchsii*** (Druce) Hyl. – G bulb – Eurasiat.

Note: this species was recorded by Ballelli and Francalancia (1982) under the name *Orchis maculata* subsp. *saccifera*.

***Dactylorhiza sambucina*** (L.) Soó – G bulb – Europ.

****Epipactis atrorubens*** (Hoffm.) Besser – G rhiz – Eurasiat.

***Epipactis exilis*** P.Delforge – G rhiz – Europ.

Note: this species was recorded by Ballelli and Francalancia (1982) under the name *Epipactis leptochila*.

Conservation status: LC (Least concern) (Orsenigo et al. 2020).

***Epipactis helleborine*** (L.) Crantz – G rhiz – Eurasiat.

***Gymnadenia conopsea*** (L.) R.Br. – G bulb – Eurosib.

***Limodorum abortivum*** (L.) Sw. – G rhiz – Medit.

***Neotinea maculata*** (Desf.) Stearn – G bulb – Medit.

***Neotinea tridentata*** (Scop.) R.M.Bateman, Pridgeon &M.W.Chase – G bulb – Medit.

***Neotinea ustulata*** (L.) R.M.Bateman, Pridgeon &M.W.Chase – G bulb – Eurosib.

***Neottia nidus-avis*** (L.) Rich. – G rhiz – Eurosib.

***Neottia ovata*** (L.) Bluff &Fingerh. – G rhiz – Eurasiat.

***Ophrys apifera*** Huds. – G bulb – Medit.

**E** ****Ophrys classica*** Devillers-Tersch. &Devillers – G bulb – Endem.

Conservation status: LC (Least concern) (Orsenigo et al. 2018).

****Ophrys insectifera*** L. – G bulb – Europ.

***Orchis anthropophora*** (L.) All. – G bulb – Medit.

***Orchis mascula*** (L.) L. subsp. ***mascula*** – G bulb – Europ.

***Orchis pauciflora*** Ten. – G bulb – Medit.

Conservation status: LC (Least concern) (Orsenigo et al. 2020).

***Orchis provincialis*** Balb. ex Lam. &DC. – G bulb – Medit.

Conservation status: LC (Least concern) (Rossi et al. 2013).

***Orchis purpurea*** Huds. – G bulb – Europ.

***Orchis simia*** Lam. – G bulb – S Europ.

****Orchis*** ×***angusticruris*** Franch. (*O. mascula* × *O. simia*) – G bulb – Europ.

***Orchis*** ×***colemanii*** Cortesi (*O. mascula* × *O. pauciflora*) – G bulb – Europ.

Iridaceae

***Crocus neglectus*** Peruzzi &Carta – G bulb – Medit. mont.

Note: this species was recorded by Ballelli and Francalancia (1982) under the name *Crocus neapolitanus.*

Asphodelaceae

***Asphodelus macrocarpus*** Parl. subsp. ***macrocarpus*** – G rhiz – Medit. mont.

Note: this species was recorded by Ballelli and Francalancia (1982) under the name *A. albus.*

Amaryllidaceae

***Allium* *coloratum*** Spreng. – G bulb – Medit. mont.

Note: this species was recorded by Ballelli and Francalancia (1987) under the name *A. carinatum.*

***Allium pendulinum*** Ten. – G bulb – Medit.

Conservation status: LC (Least concern) (Orsenigo et al. 2020).

***Allium sphaerocephalon*** L. subsp. ***sphaerocephalon*** – G bulb – Medit.

***Allium ursinum*** L. – G bulb – Europ.

***Allium vineale*** L. – G bulb – Europ.

***Galanthus nivalis*** L. – G bulb – S Europ.

Conservation status: LC (Least concern) (Rossi et al. 2013).

***Narcissus poëticus*** L. – G bulb – SW Europ. mont.

***Sternbergia colchiciflora*** Waldst. &Kit. – G bulb – SE Europ./W Asiat.

Asparagaceae

***Loncomelos brevistylus*** (Wolfner) Dostál – G bulb – Medit.

Note: this species was recorded by Ballelli and Francalancia (1982) under the name *Ornithogalum narbonense.*

***Loncomelos pyrenaicus*** (L.) L.D.Hrouda subsp. ***pyrenaicus*** – G bulb – Medit.

***Muscari comosum*** (L.) Mill. – G bulb – Medit.

***Muscari neglectum*** Guss. ex Ten. – G bulb – Medit.

***Ornithogalum comosum*** L. – G bulb – Medit. mont.

**E *Ornithogalum etruscum*** Parl. subsp. ***etruscum*** – G bulb – Endem.

Note: this species was recorded by Ballelli and Francalancia (1982) under the name *Ornithogalum umbellatum.*

Conservation status: LC (Least concern) (Orsenigo et al. 2018).

**E******Ornithogalum orthophyllum*** Ten. – G bulb – Endem.

Conservation status: DD (Data deficient) (Orsenigo et al. 2018).

***Polygonatum multiflorum*** (L.) All. – G rhiz – Eurasiat.

***Ruscus aculeatus*** L. – G rhiz – Medit.

Conservation status: LC (Least concern) (Rossi et al. 2013).

***Ruscus hypoglossum*** L. – G rhiz – Medit.

***Scilla bifolia*** L. – G bulb – S Europ.

Juncaceae

***Juncus articulatus*** L. subsp. ***articulatus*** – G rhiz – Eurosib./N Amer.

***Juncus inflexus*** L. subsp. ***inflexus*** – H caesp – Eurasiat.

***Luzula campestris*** (L.) DC. subsp. ***campestris*** – H caesp – Europ.

***Luzula forsteri*** (Sm.) DC. – H caesp – S Europ.

****Luzula multiflora*** (Ehrh.) Lej. subsp. ***multiflora*** – H caesp – Europ./N Amer.

***#Luzula sylvatica*** (Huds.) Gaudin subsp. ***sieberi*** (Tausch) K.Richt. – H caesp – S Europ. mont.

***Luzula sylvatica*** (Huds.) Gaudin subsp. ***sylvatica*** – H caesp – Europ.

Cyperaceae

***Carex caryophyllea*** Latourr. – H scap – Eurasiat.

***Carex digitata*** L. – H caesp – Eurosib.

****Carex distans*** L. – H caesp – Europ.

***Carex divulsa*** Stokes – H caesp – Medit.

***Carex flacca*** Schreb. subsp. ***erythrostachys*** (Hoppe) Holub – G rhiz – Europ.

***Carex flacca*** Schreb. subsp. ***flacca*** – G rhiz – Europ.

***Carex halleriana*** Asso – H caesp – Medit.

***Carex macrolepis*** DC. – H caesp – Subendem.

Conservation status: LC (Least concern) (Orsenigo et al. 2020).

***Carex spicata*** Huds. – H caesp – Eurasiat.

***Carex sylvatica*** Huds. – H caesp – Europ./W Asiat.

Poaceae

***Achnatherum virescens*** (Trin.) Banfi, Galasso & Bartolucci – H caesp – SE Europ./SW Asiat.

***Agrostis capillaris*** L. subsp. ***capillaris*** – H caesp – Eurasiat.

***Agrostis stolonifera*** L. subsp. ***stolonifera*** – H rept – Eurasiat./N Amer.

***Aira caryophyllea*** L. subsp. ***caryophyllea*** – T scap – W Europ./Medit.

***Anisantha diandra*** (Roth) Tutin ex Tzvelev – T scap – Medit.

***Anisantha sterilis*** (L.) Nevski – T scap – Eurasiat.

***Anthoxanthum nipponicum*** Honda – H caesp – Artic./Alp.

***Anthoxanthum odoratum*** L. subsp. ***odoratum*** – H caesp – Eurasiat.

***Arrhenatherum elatius*** (L.) P.Beauv. ex J.Presl &C.Presl subsp. ***elatius*** – H caesp – Europ./W Asiat.

A CAS****Avena sativa*** L. subsp. ***sativa*** – T scap – Medit./W Asiat.

***Bellardiochloa variegata*** (Lam.) Kerguélen subs. ***variegata*** – H caesp – S Europ. mont.

***Brachypodium rupestre*** (Host) Roem. &Schult. – H caesp – Europ.

Note: this species was recorded by Ballelli and Francalancia (1982, 1987) under the name *Brachypodium pinnatum.*

***Brachypodium sylvaticum*** (Huds.) P.Beauv. – H caesp – Eurasiat.

***Briza media*** L. – H caesp – Europ./W Asiat.

***Bromopsis benekenii*** (Lange) Holub – H caesp – Europ./W Asiat.

***Bromopsis erecta*** (Huds.) Fourr. – H caesp – Europ.

***Bromopsis ramosa*** (Huds.) Holub subsp. ***ramosa*** – H caesp – Europ.

* ***#******Bromopsis transylvanica*** (Steud.) Holub – H caesp – SE Europ. mont.

***Bromus hordeaceus*** L. subsp. ***hordeaceus*** – T scap – Eurasiat.

***Bromus squarrosus*** L. subsp. ***squarrosus*** – T scap – Medit./W Asiat.

***Cynosurus cristatus*** L. – H caesp – Eurasiat.

***Cynosurus echinatus*** L. – T scap – Medit.

***Dactylis glomerata*** L. subsp. ***glomerata*** – H caesp – Eurasiat.

***Dactylis glomerata*** L. subsp. ***hispanica*** (Roth) Nyman – H caesp – Medit.

***Dasypyrum villosum*** (L.) P.Candargy – T scap – Medit.

***Drymochloa sylvatica*** (Pollich) Holub – H caesp – Eurosib.

***Elymus caninus*** (L.) L. – H caesp – Eurasiat.

***Elytrigia repens*** (L.) Gould subsp. ***repens*** – G rhiz – Eurasiat.

***Festuca circummediterranea*** Patzke – H caesp – Medit.

Conservation status: LC (Least concern) (Orsenigo et al. 2020).

***Festuca heterophylla*** Lam. – H caesp – Europ./W Asiat.

***Festuca inops*** De Not. – H caesp – SW Europ. mont.

Conservation status: LC (Least concern) (Orsenigo et al. 2020).

***Festuca laevigata*** Gaudin – H caesp – SW Europ. mont.

****Festuca myuros*** L. subsp. ***myuros*** – T scap – Medit.

****Festuca rubra*** L. subsp. ***commutata*** (Gaudin) Markgr.-Dann. – H caesp – Europ.

****Festuca rubra*** L. subsp. ***microphylla*** St.-Yves – H caesp – Europ.

***Festuca stricta*** Host subsp. ***trachyphylla*** (Hack.) Patzke ex Pils – H caesp – Europ.

****Glyceria fluitans*** (L.) R.Br. – G rhiz – Eurasiat./N Amer.

**E *Helictochloa praetutiana*** (Parl. ex Arcang.) Bartolucci, F.Conti, Peruzzi subsp. ***praetutiana*** – H caesp – Endem.

Conservation status: LC (Least concern) (Orsenigo et al. 2018).

***Holcus lanatus*** L. subsp. ***lanatus*** – H caesp – Europ.

***Hordelymus europaeus*** (L.) Harz – H caesp – Europ.

***Hordeum bulbosum*** L. – H caesp – Medit.

***Hordeum murinum*** L. subsp. ***leporinum*** (Link) Arcang. – T scap – Medit.

****Koeleria australis*** A.Kern. – H caesp – SE Europ. mont.

****Koeleria*** ***callieri*** (Domin) Ujhelyi – H caesp – SE Europ. mont.

***Koeleria macrantha*** (Ledeb.) Schult. subsp. ***macrantha*** – H caesp – Eurasiat.

**E *Koeleria splendens*** C.Presl – H caesp – Endem.

Conservation status: LC (Least concern) (Orsenigo et al. 2018).

***Lolium apenninum*** (De Not.) Ardenghi &Foggi – H caesp – SE Europ. mont.

Note: this species was recorded by Ballelli and Francalancia (1982) under the name *Festuca pratensis.*

***Lolium arundinaceum*** (Schreb.) Darbysh. subsp. ***arundinaceum*** – H caesp – Europ.

***Lolium perenne*** L. – H caesp – Eurasiat.

***Melica ciliata*** L. subsp. ***ciliata*** – H caesp – Medit./SW Asiat.

***Melica uniflora*** Retz. – H caesp – Europ.

***Milium effusum*** L. subsp. ***effusum*** – G rhiz – Eurasiat./N Amer.

***Milium vernale*** M.Bieb. subsp. ***vernale*** – T scap – Medit. mont.

***Phleum hirsutum*** Honck. subsp. ***ambiguum*** (Ten.) Cif. &Giacom. – G rhiz – SE Europ. mont./Medit.

***Phleum pratense*** L. subsp. ***pratense*** – H caesp – Europ.

***Poa alpina*** L. subsp. ***alpina*** – H caesp – Eurosib./N Amer.

****Poa angustifolia*** L. – H caesp – Cosmopol.

***Poa annua*** L. – T caesp – Cosmopol.

***Poa bulbosa*** L. subsp. ***bulbosa*** – H caesp – Eurasiat.

***Poa compressa*** L. – H caesp – Eurasiat.

***Poa molinerii*** Balb. – H caesp – S Europ. mont.

***Poa nemoralis*** L. subsp. ***nemoralis*** – H caesp – Eurasiat./N Amer.

***Poa pratensis*** L. subsp. ***pratensis*** – H caesp – Eurasiat.

***Poa sylvicola*** Guss. – H caesp – S Europ./W Asiat.

***Poa trivialis*** L. – H caesp – Eurasiat./N Amer.

****Polypogon viridis*** (Gouan) Breistr. – H scap – Subcosmopol.

A CAS ***Secale cereale*** L. subsp. ***cereale*** – T scap – SW Asiat.

**E *Sesleria italica*** (Pamp.) Ujhelyi – H caesp – Endem.

Conservation status: LC (Least concern) (Orsenigo et al. 2018).

****Sesleria juncifolia*** Wulfen ex Suffren subsp. ***juncifolia*** – H caesp – Anfiadriat.

Conservation status: LC (Least concern) (Orsenigo et al. 2020).

**E *Sesleria nitida*** Ten subsp. ***nitida*** – H caesp – Endem.

Conservation status: LC (Least concern) (Orsenigo et al. 2018).

***C*** ****Setaria italica*** (L.) P.Beauv. subsp. ***viridis*** (L.) Thell. – T scap – Asiat.

**E *Stipa dasyvaginata*** Martinovský subsp. ***apenninicola*** Martinovský &Moraldo – H caesp – Endem.

Note: this species was recorded by Ballelli and Francalancia (1982) under the name *Stipa pennata* subsp. *eriocaulis.*

Conservation status: LC (Least concern) (Orsenigo et al. 2018).

**E *Trisetaria villosa*** (Bertol.) Banfi &Soldano – H caesp – Endem.

Note: this species was recorded by Ballelli and Francalancia (1982) under the name *Trisetum villosum.*

Conservation status: LC (Least concern) (Orsenigo et al. 2018).

Papaveraceae

***Corydalis cava*** (L.) Schweigg. &Körte subsp. ***cava*** – G bulb – Europ.

***Corydalis pumila*** (Host) Rchb. – G bulb – Europ.

Note: this species was recorded by Ballelli and Francalancia (1982) under the name *C. solida.*

***Papaver dubium*** L. – T scap – Europ.

***Papaver rhoeas*** L. subsp. ***rhoeas*** – T scap – Medit.

Ranunculaceae

***Actaea spicata*** L. – G rhiz – Eurasiat.

***Anemonoides nemorosa*** (L.) Holub – G rhiz – Europ.

***Anemonoides ranunculoides*** (L.) Holub – G rhiz – Europ.

***Aquilegia dumeticola*** Jord. – H scap – S Europ. mont.

Note: this species was recorded by Ballelli and Francalancia (1982) under the name *A. vulgaris.*

***Clematis vitalba*** L. – P lian – Europ.

****Delphinium fissum*** Waldst. &Kit. subsp. ***fissum*** – H scap – S Europ. mont.

***Eranthis hyemalis*** (L.) Salisb. – G rhiz – S Europ.

***Ficaria verna*** Huds. subsp. ***verna*** – G bulb – Europ.

Note: some collected specimen might belong to *F. verna* subsp. *bulbifera* (Pignatti et al. 2017a).This latter taxon is included by Bartolucci et al. (2018) in *F. verna* subsp. *verna.*

***Helleborus foetidus*** L. subsp. ***foetidus*** – Ch suffr – SW Europ.

**E *Helleborus viridis*** L. subsp. ***bocconei*** (Ten.) Peruzzi – G rhiz – Endem.

Conservation status: LC (Least concern) (Orsenigo et al. 2018).

***Hepatica nobilis*** Mill. – G rhiz – Europ.

**E *Ranunculus apenninus*** (Chiov.) Pignatti – H scap – Endem.

Conservation status: LC (Least concern) (Orsenigo et al. 2018).

***Ranunculus breyninus*** Crantz – H scap – S Europ. mont.

***Ranunculus bulbosus*** L. – H scap – Europ./SW Asiat.

Note: in this species is included *R. bulbosus* subsp. *aleae* (Ballelli and Francalancia 1982).

***Ranunculus illyricus*** L. – H scap – SE Europ./SW Asiat.

***Ranunculus lanuginosus*** L. – H scap – Europ.

***Ranunculus millefoliatus*** Vahl – H scap – Medit.

**E******Ranunculus pollinensis*** (N.Terracc.) Chiov. – H scap – Endem.

Conservation status: LC (Least concern) (Orsenigo et al. 2018).

***Ranunculus repens*** L. – H rept – Eurasiat.

***Ranunculus tuberosus*** Lapeyr. – H scap – Europ.

****Ranunculus velutinus*** Ten. – H scap – Medit.

***Thalictrum aquilegiifolium*** L. subsp. ***aquilegiifolium*** – H scap – Europ.

Paeoniaceae

**E *Paeonia officinalis*** L. subsp. ***italica*** N.G.Passal. &Bernardo – G rhiz – Endem.

Note: this species was recorded by Ballelli and Francalancia (1982) under the name *P. officinalis* subsp. *villosa.*

Conservation status: LC (Least concern) (Orsenigo et al. 2018).

Grossulariaceae

***Ribes alpinum*** L. – NP – Europ./SW Asiat.

***Ribes multiflorum*** Kit. ex Roem. &Schult. subsp. ***multiflorum*** – NP – Medit. mont.

***Ribes uva-crispa*** L. subsp. ***uva-crispa*** – NP – Eurasiat.

Saxifragaceae

***Saxifraga bulbifera*** L. – H scap – SE Europ. mont.

***Saxifraga callosa*** Sm. subsp. ***callosa*** – Ch pulv – SW Europ. mont.

***Saxifraga granulata*** L. subsp. ***granulata*** – H scap – Europ.

***Saxifraga paniculata*** Mill. – Ch pulv – Europ./N Amer.

***Saxifraga rotundifolia*** L. subsp. ***rotundifolia*** – H scap – S Europ. mont.

***Saxifraga tridactylites*** L. – T scap – Europ./SW Asiat.

Crassulaceae

****Hylotelephium maximum*** (L.) Holub subsp. ***maximum*** – Ch pulv – S Europ. mont.

***Petrosedum rupestre*** (L.) P.V.Heath – Ch succ – Europ.

***Sedum acre*** L. – Ch succ – Europ.

***Sedum album*** L. subsp. ***album*** – Ch succ – Medit.

***Sedum dasyphyllum*** L. subsp. ***dasyphyllum*** – Ch succ – Medit.

***Sedum hispanicum*** L. – T scap – SE Europ./SW Asiat.

***Sedum rubens*** L. – T scap – Medit.

***Sedum sexangulare*** L. – Ch succ – Europ.

***Sempervivum tectorum*** L. – Ch succ – S Europ. mont.

Vitaceae

****Vitis vinifera*** L. – P lian

Fabaceae

***Anthyllis vulneraria*** L. subsp. ***polyphylla*** (DC.) Nyman – H scap – SE Europ./W Asiat.

***Anthyllis vulneraria*** L. subsp. ***pulchella*** (Vis.) Bornm. – H scap – SE Europ.

****Anthyllis vulneraria*** L. subsp. ***rubriflora*** (DC.) Arcang. – H scap – Medit.

***Anthyllis vulneraria*** L. subsp. ***weldeniana*** (Rchb.) Cullen – H scap – SE Europ. mont.

***Argyrolobium zanonii*** (Turra) P.W.Ball subsp. ***zanonii*** – Ch suffr – SW Europ.

***Astragalus depressus*** L. subsp. ***depressus*** – H ros – S Europ./W Asiat.

***Astragalus glycyphyllos*** L. – H rept – Europ./W Asiat.

***Astragalus sempervirens*** Lam. – Ch frut – Medit. mont.

***Coronilla minima*** L. subsp. ***minima*** – Ch suffr – Medit.

***Coronilla scorpioides*** (L.) W.D.J.Koch – T scap – Medit.

***Cytisophyllum sessilifolium*** (L.) O.Lang – P caesp – SW Europ.

***Cytisus hirsutus*** L. – Ch suffr – S Europ./W Asiat.

***Emerus major*** Mill. subsp. ***major*** – NP – SE Europ./SW Asiat.

***Ervilia hirsuta*** (L.) Opiz – T scap – Eurasiat.

A CAS ***Galega officinalis*** L. – H scap – SE Europ./SW Asiat.

***Genista januensis*** Viv. subsp. ***januensis*** – Ch suffr – SE Europ.

***Genista tinctoria*** L.– Ch suffr – S Europ./W Asiat.

Note: some collected specimens might belong to *G. tinctoria* subsp. *tenuifolia* (Pignatti et al. 2017b).This latter taxon is included by Bartolucci et al. (2018) in *G. tinctoria.*

***Hippocrepis comosa*** L. subsp. ***comosa*** – H caesp – Europ.

***Laburnum anagyroides*** Medik. subsp. ***anagyroides*** – P scap – S Europ. mont.

***Lathyrus cicera*** L. – T scap – Medit.

****Lathyrus nissolia*** L. – T scap – Medit.

***Lathyrus pratensis*** L. subsp. ***pratensis*** – H scap – Eurasiat.

***Lathyrus sphaericus*** Retz. – T scap – Medit.

***Lathyrus sylvestris*** L. subsp. ***sylvestris*** – H scand – Europ.

***Lathyrus venetus*** (Mill.) Wohlf. – G rhiz – SE Europ.

***Lotus corniculatus*** L. subsp. ***corniculatus*** – H scap – Eurasiat./Afr.

***Lotus herbaceus*** (Vill.) Jauzein. – H scap – SE Europ.

***Medicago lupulina*** L. – T scap – Eurasiat./N Afr.

****Medicago minima*** (L.) L. – T scap – Medit./SW Asiat.

***Medicago polymorpha*** L. – T scap – Medit.

***Medicago sativa*** L. – H scap – Medit.

***Onobrychis viciifolia*** Scop. – H scap – SE Europ.

***Ononis pusilla*** L. subsp. ***pusilla*** – H scap – Medit.

***Ononis spinosa*** L. subsp. ***spinosa*** – Ch suffr – Europ.

***Securigera varia*** (L.) Lassen – H scap – Europ./W Asiat.

***Spartium junceum*** L. – P caesp – Medit.

***Sulla coronaria*** (L.) Medik. – H scap – Medit.

***Trifolium alpestre*** L. – H scap – Europ.

***Trifolium arvense*** L. subsp. ***arvense*** – T scap – Medit.

***Trifolium campestre*** Schreb. – T scap – Medit.

****Trifolium dubium*** Sibth. – T scap – Medit.

****Trifolium incarnatum*** L. subsp. ***molinerii*** (Balb. ex Hornem.) Ces. – T scap – Medit.

***Trifolium lucanicum*** Gasp*.* ex Guss. – T scap – Medit. mont.

***Trifolium medium*** L. subsp. ***medium*** – G rhiz – Eurosib.

****Trifolium micranthum*** Viv. – T scap – W Europ./Medit.

***Trifolium montanum*** L. subsp. ***rupestre*** (Ten.) Nyman – H scap – Medit. mont.

****Trifolium nigrescens*** Viv. subsp. ***nigrescens*** – T scap – Medit.

***Trifolium ochroleucon*** Huds. – H caesp – Europ./W Asiat.

***Trifolium phleoides*** Willd. – T scap – Medit. mont.

***Trifolium pratense*** L. subsp. ***pratense*** – H scap – Eurosib.

***Trifolium repens*** L. – H rept – Eurosib.

***Trifolium rubens*** L. – H scap – Europ.

***Trifolium scabrum*** L. – T rept – Medit.

****Trifolium stellatum*** L. – T scap – Medit.

***Trifolium striatum*** L. subsp. ***striatum*** – T scap – W Europ./Medit.

****Trigonella alba*** (Medik.) Coulot &Rabaute – T scap – Eurasiat.

****Trigonella officinalis*** (L.) Coulot &Rabaute – H bienn – Eurasiat.

***Vicia angustifolia*** L. – T scap – Medit.

Note: this species was recorded by Ballelli and Francalancia (1982) under the name *V. sativa* subsp. *segetalis.*

****Vicia bithynica*** (L.) L. – T scap – W Europ./Medit.

***Vicia cracca*** L. – H scap – Eurasiat.

****Vicia ervoides*** (Brign.) Hampe – T scap – Medit./W Asiat.

****Vicia lathyroides*** L. – T scap – Medit.

****Vicia macrocarpa*** (Moris) Bertol. – T scap – Subcosmopol.

***Vicia onobrychioides*** L. – H scap – Medit.

***Vicia sepium*** L. – H scap – Eurosib.

***Vicia tenuifolia*** Roth subsp. ***tenuifolia*** – H scap – Medit./W Asiat.

Polygalaceae

****Polygala alpestris*** Rchb. subsp. ***alpestris*** – H scap – S Europ. mont.

***Polygala major*** Jacq. – H scap – SE Europ./SW Asiat.

***Polygala nicaeensis*** Risso ex W.D.J.Koch subsp. ***mediterranea*** Chodat – H scap – Medit.

***Polygala vulgaris*** L. subsp. ***vulgaris*** – H scap – Europ.

Rosaceae

***Agrimonia eupatoria*** L. subsp. ***eupatoria*** – H scap – Europ./SW Asiat.

****Alchemilla colorata*** Buser – H ros – S Europ. mont.

****Alchemilla strigosula*** Buser – H ros – SW Europ. mont.

***Amelanchier ovalis*** Medik. subsp. ***ovalis*** – P caesp – Europ./SW Asiat.

***Aphanes arvensis*** L. – T scap – Subcosmopol.

***Cotoneaster tomentosus*** (Aiton) Lindl. – NP – S Europ. mont.

Note: this species was recorded by Ballelli and Francalancia (1982) under the name *C. nebrodensis.*

***Crataegus laevigata*** (Poir.) DC. – P caesp – Europ.

***Crataegus monogyna*** Jacq. – P caesp – Europ./W Asiat.

***Filipendula vulgaris*** Moench – H scap – Eurasiat.

***Fragaria vesca*** L. subsp. ***vesca*** – H rept – Eurasiat.

***Geum urbanum*** L. – H scap – Eurasiat.

A NAT ***Malus domestica*** (Borkh.) Borkh. – P scap – Europ./W Asiat.

***Malus sylvestris*** (L.) Mill. – P scap – Europ./W Asiat.

***Potentilla caulescens*** L. subsp. ***caulescens*** – Ch suffr – S Europ. mont.

***Potentilla micrantha*** Ramond ex DC. – H ros – Medit.

***Potentilla pedata*** Willd. ex Hornem. – H scap – SE Europ./Asiat.

***Potentilla reptans*** L. – H rept – Eurasiat.

**E *Potentilla rigoana*** Th.Wolf – H scap – Endem.

Note: this species was recorded by Ballelli and Francalancia (1982) under the name *P. tabernaemontani.*

Conservation status: LC (Least concern) (Orsenigo et al. 2018).

***Poterium sanguisorba*** L. subsp. ***balearicum*** (Bourg. ex Nyman) Stace – H scap – S Europ./SW Asiat.

***Prunus avium*** (L.) L. – P scap – Europ./W Asiat.

***Prunus mahaleb*** L. subsp. ***mahaleb*** – P caesp – S Europ./SW Asiat.

***Prunus spinosa*** L. subsp. ***spinosa*** – P caesp – Europ./W Asiat.

***Pyrus communis*** L. subsp. ***pyraster*** (L.) Ehrh. – P caesp – Europ./W Asiat.

******Rosa arvensis*** Huds. – NP – Europ.

***Rosa balsamica*** Besser – NP – Europ.

***Rosa canina*** L. – NP – Eurasiat.

***Rosa corymbifera*** Borkh. – NP – Europ./NW Afr./SW Asiat.

***Rosa subcanina*** (Christ) Vuk. – NP – Europ./W Asiat.

***Rosa subcollina*** (Christ) Vuk. – NP – Europ./W Asiat.

***Rubus caesius*** L. – NP – Europ./W Asiat.

***Rubus canescens*** DC. – NP – Medit.

***Rubus hirtus*** Waldst. & Kit. group – NP – Europ./W Asiat.

***Rubus hirtus*** × ***R. canescens*** – NP

***Rubus idaeus*** L. subsp. ***idaeus*** – NP – Eurosib.

***Rubus ulmifolius*** Schott – NP – Medit.

***Rubus ulmifolius*** × ***R. canescens*** – NP – Medit.

***Sorbus aria*** (L.) Crantz – P scap – Europ. mont.

***Sorbus aucuparia*** L. subsp. ***aucuparia*** – P scap – Eurosib.

***Sorbus domestica*** L. – P scap – Medit.

***Sorbus torminalis*** (L.) Crantz – P scap – Europ.

Rhamnaceae

***Rhamnus cathartica*** L. – P scap – Eurasiat.

Cannabaceae

***Celtis australis*** L. subsp. ***australis*** – P scap – Medit.

Ulmaceae

***Ulmus glabra*** Huds. – P scap – Europ.

***Ulmus minor*** Mill. subsp. ***minor*** – P scap – Europ.

Urticaceae

***Urtica dioica*** L. subsp. ***dioica*** – H scap – Subcosmopol.

Fagaceae

***Fagus sylvatica*** L. subsp. ***sylvatica*** – P scap – Europ.

Note: some specimens are to be referred to *F.* *sylvatica* var. *purpurea* (Cianfaglione and Pedrotti 2019).

***Quercus cerris*** L. – P scap – SE Europ./SW Asiat.

***Quercus ilex*** L. subsp. ***ilex*** – P caesp – Medit.

***Quercus pubescens*** Willd. subsp. ***pubescens*** – P scap – S Europ.

Betulaceae

****Carpinus betulus*** L. – P scap – Europ./SW Asiat.

***Corylus avellana*** L. – P caesp – Europ.

***Ostrya carpinifolia*** Scop. – P scap – SE Europ.

Celastraceae

***Euonymus europaeus*** L. – P caesp – Europ.

***Euonymus latifolius*** (L.) Mill. – P caesp – S Europ. mont.

***Euonymus verrucosus*** Scop. – P caesp – S Europ.-S Siber

Euphorbiaceae

***Euphorbia amygdaloides*** L. subsp. ***amygdaloides*** – Ch suffr – Europ./W Asiat.

***Euphorbia dulcis*** L. – G rhiz – Europ.

**E *Euphorbia gasparrinii*** Boiss. subsp. ***samnitica*** (Fiori) Pignatti – Ch suffr – Endem.

Conservation status: LC (Least concern) (Orsenigo et al. 2018).

***Euphorbia helioscopia*** L. subsp. ***helioscopia*** – T scap – Eurasiat.

***Euphorbia myrsinites*** L. subsp. ***myrsinites*** – Ch rept – Medit./SW Asiat.

***Mercurialis perennis*** L. – G rhiz – Europ./SW Asiat.

Salicaceae

****Salix caprea*** L. – P scap – Eurasiat.

***Salix eleagnos*** Scop. – P caesp – S Europ. mont.

***Salix purpurea*** L. subsp. ***purpurea*** – P caesp – Eurasiat.

Violaceae

***Viola alba*** Besser subsp. ***dehnhardtii*** (Ten.) W.Becker – H ros – Medit.

****Viola arvensis*** Murray subsp. ***arvensis*** – T scap – Medit.

**E *Viola eugeniae*** Parl. subsp. ***eugeniae*** – H scap – Endem.

Conservation status: LC (Least concern) (Orsenigo et al. 2018).

***Viola odorata*** L. – H ros – Medit.

***Viola reichenbachiana*** Jord. ex Boreau – H scap – Europ.

***Viola tricolor*** L. subsp. ***tricolor*** – T scap – Eurasiat.

Linaceae

***Linum catharticum*** L. subsp. ***catharticum*** – T scap – Europ./W Asiat.

****Linum corymbulosum*** Rchb. – T scap – Medit.

***Linum tenuifolium*** L. – Ch suffr – Medit.

***Linum trigynum*** L. – T scap – Medit.

***Linum usitatissimum*** L. subsp. ***angustifolium*** (Huds.) Thell. – H bienn – Medit.

****Linum viscosum*** L. – H scap – S Europ. mont.

Hypericaceae

***Hypericum hirsutum*** L. – H scap – Eurosib.

***Hypericum montanum*** L. – H scap – Eurosib.

***Hypericum perforatum*** L. subsp. ***veronense*** (Schrank) Ces. – H scap – S Europ./SW Asiat.

Note: this species was recorded by Ballelli and Francalancia (1982) under the name *H. perforatum* subsp*. perforatum*

***Hypericum tetrapterum*** Fr. – H scap – Europ.

Geraniaceae

***Erodium cicutarium*** (L.) L'Hér. – H scap – Medit.

***Geranium columbinum*** L. – T scap – Medit.

***Geranium dissectum*** L. – T scap – Medit.

***Geranium lucidum*** L. – T scap – Medit.

***Geranium molle*** L. – T scap – Medit.

****Geranium purpureum*** Vill. – T scap – Medit.

***Geranium pyrenaicum*** Burm.f. subsp. ***pyrenaicum*** – H scap – Medit. mont.

***Geranium reflexum*** L. – H scap – Medit. mont.

***Geranium robertianum*** L. – T scap – Eurasiat./N Amer.

Onagraceae

***Chamaenerion dodonaei*** (Vill.) Schur ex Fuss – H scap – S Europ.

***Epilobium hirsutum*** L. – H scap – Eurasiat.

***Epilobium lanceolatum*** Sebast. &Mauri – H scap – Europ.

***Epilobium montanum*** L. – H scap – Eurasiat.

***Epilobium parviflorum*** Schreb. – H scap – Europ.

Staphyleaceae

***Staphylea pinnata*** L. – P scap – SE Europ./SW Asiat.

Anacardiaceae

***Cotinus coggygria*** Scop. – NP – Medit.-Turan.

Sapindaceae

***Acer campestre*** L. – P scap – Europ./W Asiat.

***Acer monspessulanum*** L. subsp. ***monspessulanum*** – P scap – Medit.

***Acer opalus*** Mill. subsp. ***obtusatum*** (Waldst. &Kit. ex Willd.) Gams – P scap – SE Europ.

***Acer platanoides*** L. – P scap – Europ./W Asiat.

***Acer pseudoplatanus*** L. – P scap – Europ./W Asiat.

Malvaceae

***Malva alcea*** L. – H scap – S Europ.

***Malva neglecta*** Wallr. – T scap – S Europ./Asiat.

***Malva sylvestris*** L. – H scap – S Europ./Asiat.

****Tilia cordata*** Mill. – P scap – Europ.

***Tilia platyphyllos*** Scop. subsp. ***platyphyllos*** – P scap – Europ.

****Tilia*** ×***vulgaris*** Hayne – P scap – Europ.

Thymelaeaceae

***Daphne laureola*** L. – P caesp – W Europ./Medit.

Cistaceae

****Fumana procumbens*** (Dunal) Gren. &Godr. – Ch suffr – S Europ./SW Asiat.

***Helianthemum apenninum*** (L.) Mill. subsp. ***apenninum*** – Ch suffr – Medit.

***Helianthemum nummularium*** (L.) Mill. subsp. ***obscurum*** (Čelak.) Holub – Ch suffr – Europ.

***Helianthemum oelandicum*** (L.) Dum.Cours. subsp. ***incanum*** (Willk.) G.López – Ch suffr – Europ.-Cauc.

***Helianthemum oelandicum*** (L.) Dum.Cours. subsp. ***italicum*** (L.) Ces. – Ch suffr – Europ.-Cauc.

Resedaceae

***Reseda luteola*** L. – H scap – Medit.

Brassicaceae

***Aethionema saxatile*** (L.) R.Br. – Ch suffr – Medit.

***Alliaria petiolata*** (M.Bieb.) Cavara &Grande – H scap – Europ./W Asiat.

***Alyssum alyssoides*** (L.) L. – T scap – Medit.

**E#*Alyssum diffusum*** Ten. subsp. ***diffusum*** – Ch suffr – Endem.

Note: this species was recorded by Ballelli and Francalancia (1982) under the name *A. montanum.*

***Alyssum simplex*** Rudolphi – T scap – Medit./SW Asiat.

Note: this species was recorded by Ballelli and Francalancia (1982) under the name *A. minus.*

***Arabidopsis thaliana*** (L.) Heynh. – T scap – Medit.

***Arabis alpina*** L. subsp. ***caucasica*** (Willd.) Briq. – H scap – Medit./SW Asiat.

***Arabis auriculata*** Lam. – T scap – Medit.

***Arabis collina*** Ten. subsp. ***collina*** – H scap – S Europ.

***Arabis hirsuta*** (L.) Scop. – H scap – Eurasiat.

***Arabis sagittata*** (Bertol.) DC. – H scap – Medit.

***Barbarea bracteosa*** Guss. – H scap – S Europ. mont.

***Barbarea vulgaris*** R.Br. – H scap – Eurasiat.

****Bunias erucago***L. – T scap – Medit.

***Calepina irregularis*** (Asso) Thell. – T scap – Medit.

***Capsella rubella*** Reut. – T scap – Medit.

***Cardamine bulbifera*** (L.) Crantz – G rhiz – Europ.

***Cardamine enneaphyllos*** (L.) Crantz – G rhiz – S Europ. mont.

****Cardamine graeca*** L. – T scap – Medit.

***Cardamine heptaphylla*** (Vill.) O.E.Schulz – G rhiz – S Europ. mont.

***Cardamine hirsuta*** L. – T scap – W Europ./Medit.

***Draba aizoides*** L. subsp. ***aizoides*** – H ros – S Europ. mont.

Note: this species was recorded by Ballelli and Francalancia (1982) under the name *D. aspera.*

***Draba verna*** L. subsp. ***praecox*** (Steven) Rouy &Foucaud – T scap – Medit.

****Draba verna*** L. subsp. ***spathulata*** (Láng) Rouy &Foucaud – T scap – Eurasiat.

****Draba verna*** L. subsp. ***verna*** – T scap – Eurasiat.

***Drabella muralis*** (L.) Fourr. – T scap – W Europ./Medit.

**E** ****Erysimum apenninum*** Peccenini &Polatschek – H scap – Endem.

Conservation status: LC (Least concern) (Orsenigo et al. 2018).

**E *Erysimum pseudorhaeticum*** Polatschek – H scap – Endem.

Conservation status: LC (Least concern) (Orsenigo et al. 2018).

***Hesperis laciniata*** All. subsp. ***laciniata*** – H scap – Medit. mont.

***Hornungia petraea*** (L.) Rchb. subsp. ***petraea*** – T scap – Medit.

***Isatis tinctoria*** L. subsp. ***tinctoria*** – H bienn – SE Asiat.

***Lepidium campestre*** (L.) R.Br. – H scap – Europ./SW Asiat.

***Microthlaspi perfoliatum*** (L.) F.K.Mey. – T scap – Medit.

***Mummenhoffia alliacea*** (L.) Esmailbegi & Al-Shehbaz – T scap – S Europ.

***Noccaea brachypetala*** (Jord.) F.K.Mey. – H scap – S Europ. mont.

***Pseudoturritis turrita*** (L.) Al-Shehbaz – H scap – Medit.

Santalaceae

***Thesium humifusum*** DC. – H scap – Medit.

***Thesium linophyllon*** L. – H scap – SE Europ.

Plumbaginaceae

**E *Armeria gracilis*** Ten. subsp. ***gracilis*** – H ros – Endem.

Note: this species was recorded by Ballelli and Francalancia (1982) under the name *A. canescens* subsp. *canescens.*

Conservation status: DD (Data deficient) (Orsenigo et al. 2018).

Polygonaceae

****Polygonum*** ***aviculare*** L. subsp. ***aviculare*** – T scap – Eurasiat./N Amer.

***Rumex acetosa*** L. subsp. ***acetosa*** – H scap – Eurosib.

***Rumex acetosella*** L. subsp. ***pyrenaicus*** (Pourr. ex Lapeyr.) Akeroyd – H scap – Subcosmopol.

***Rumex conglomeratus*** Murray – H scap – Eurasiat.

***Rumex crispus*** L. – H scap – Eurasiat.

****Rumex nebroides*** Campd. – H scap – Medit. mont.

***Rumex obtusifolius*** L. subsp. ***obtusifolius*** – H scap – Europ./Caucas.

***Rumex sanguineus*** L. – H scap – Europ./SW Asiat.

***Rumex scutatus*** L. subsp. ***scutatus*** – H scap – Europ./SW Asiat.

Caryophyllaceae

A CAS ***Agrostemma githago*** L. subsp. ***githago*** – T scap – W Medit.

****Arenaria leptoclados*** (Rchb.) Guss. subsp*.* ***leptoclados*** – T scap – Europ./N Afr.

***Arenaria serpyllifolia*** L. subsp. ***serpyllifolia*** – T scap – Subcosmopol.

***Cerastium arvense*** L. subsp. ***suffruticosum*** (L.) Ces. – Ch suffr – W Alp./Appenn.

***Cerastium brachypetalum*** Desp. ex Pers. subsp. ***brachypetalum*** – T scap – Medit.

***Cerastium brachypetalum*** Desp. ex Pers. subsp. ***roeseri*** (Boiss. &Heldr.) Nyman – T scap – Medit./W Asiat.

***Cerastium glutinosum*** Fr. – T scap – Medit.

***Cerastium holosteoides*** Fr. – H scap – Eurasiat.

***Cerastium ligusticum*** Viv. – T scap – Medit.

****Cerastium pumilum*** Curtis – T scap – Medit.

***Cerastium semidecandrum*** L. – T scap – Europ./W Asiat.

**E *Cerastium tomentosum*** L. – Ch suffr – Endem.

Conservation status: LC (Least concern) (Orsenigo et al. 2018).

*****Dianthus carthusianorum*** L. subsp. ***carthusianorum*** – H scap – Europ.

Note: this species was recorded by Ballelli and Francalancia (1982) under the name *D. carthusianorum* subsp. *tenorei.*

***Dianthus hyssopifolius*** L. – H scap – S Europ. mont.

***Dianthus longicaulis*** Ten. – H caesp – Medit. mont.

Note: this species was recorded by Ballelli and Francalancia (1982) under the name *D. sylvestris* subsp. *garganicus.*

****Dianthus*** ***sylvestris*** Wulfen group – Ch suffr – Medit. mont.

Note: the collected specimens are intermediate between *D. brachycalyx* A.Huet & É.Huet ex Bacch., Brullo, Casti & Giusso and *D. sylvestris* Wulfen. Further studies are needed to clarify the taxonomy of this population.

***Drypis spinosa*** L. subsp. ***spinosa*** – Ch suffr – Illirico-Appenn.

***Herniaria glabra*** L. subsp. ***glabra*** – T scap – Europ./W Asiat.

***Lychnis flos-cuculi*** L. subsp. ***flos-cuculi*** – H scap – Europ.

****Moehringia muscosa*** L. – H caesp – S Europ. mont.

****Moehringia pentandra*** Gay – H caesp – Medit.

***Moehringia trinervia*** (L.) Clairv. – T scap – Europ./W Asiat.

***Paronychia kapela*** (Hacq.) A.Kern. subsp. ***kapela*** – H caesp – S Europ. mont.

****Petrorhagia prolifera*** (L.) P.W.Ball &Heywood – T scap – W Europ./Medit.

***Petrorhagia saxifraga*** (L.) Link subsp. ***saxifraga*** – H caesp – S Europ.

***Sabulina glaucina*** (Dvořáková) Dillenb. &Kadereit – Ch suffr – SE Europ. mont.

Note: this species was recorded by Ballelli and Francalancia (1982) under the name *Minuartia verna* subsp. *attica.*

****Sabulina tenuifolia*** (L.) Rchb. subsp. ***tenuifolia*** – T scap – Medit.

***Saponaria ocymoides*** L. subsp. ***ocymoides*** – H scap – S Europ. mont.

***Saponaria officinalis*** L. – H scap – Europ./W Asiat.

***Scleranthus annuus*** L. – T scap – Medit.

***Silene ciliata*** Pourr. subsp. ***graefferi*** (Guss.) Nyman – H caesp – S Europ. mont.

***Silene italica*** (L.) Pers. subsp. ***italica*** – H scap – Medit./W Asiat.

****Silene latifolia*** Poir. – H scap – Medit.

***Silene otites*** (L.) Wibel subsp. ***otites*** – H scap – S Europ.

***Silene vulgaris*** (Moench) Garcke subsp. ***vulgaris*** – H scap – Eurasiat.

***Stellaria holostea*** L. subsp. ***holostea*** – H scap – Europ./W Asiat.

***Stellaria media*** (L.) Vill. subsp. ***media*** – T scap – Medit.

Chenopodiaceae

***Blitum bonus-henricus*** (L.) Rchb. – H scap – Europ.

****Chenopodium album*** L. subsp. ***album*** – T scap – Subcosmopol.

Cornaceae

***Cornus mas*** L. – P caesp – Medit.

***Cornus sanguinea*** L. subsp. ***hungarica*** (Kárpáti) Soó – P caesp – SE Europ.

Note: this taxon is considered by Bartolucci et al. (2018) as taxonomically doubtful. It was recorded by Ballelli and Francalancia (1982) under the name *C. sanguinea*.

Primulaceae

***Cyclamen hederifolium*** Aiton subsp. ***hederifolium*** – G bulb – S Europ.

***Cyclamen repandum*** Sm. subsp. ***repandum*** – G bulb – Medit.

*****Primula intricata*** Gren. &Godr. – H scap – S Europ. mont.

Note: this taxon is considered by Bartolucci et al. (2018) as not present in Marche regional flora.

***Primula veris*** L. subsp. ***columnae*** (Ten.) Maire &Petitm. – H ros – S Europ./W Asiat.

***Primula vulgaris*** Huds. subsp. ***vulgaris*** – H ros – W Europ./Medit.

***Primula*** ×***polyantha*** Mill. (*P. veris* subsp. *columnae* × *P. vulgaris* subsp. *vulgaris*) – H ros – Medit. mont.

Ericaceae

***Monotropa hypopitys*** L. – G par – Eurasiat./N Amer.

Rubiaceae

***Asperula cynanchica*** L. subsp. ***cynanchica*** – H scap – Europ.

***Asperula laevigata*** L. – H scap – Medit.

***Asperula purpurea*** (L.) Ehrend. – Ch suffr – SE Europ.

***Asperula taurina*** L. subsp. ***taurina*** – G rhiz – S Europ.

***Cruciata glabra*** (L.) C.Bauhin ex Opiz – H scap – S Europ.

***Cruciata laevipes*** Opiz – H scap – Eurasiat.

***Cruciata pedemontana*** (Bellardi) Ehrend. – T scap – Medit.

****Galium album*** Mill. subsp. ***album*** – H scap – Europ.

***Galium anisophyllon*** Vill. – H scap – S Europ. mont.

***Galium aparine*** L. – T scap – Eurasiat.

****Galium corrudifolium*** Vill. – H scap – S Europ.

***Galium divaricatum*** Lam. – T scap – Medit.

***Galium lucidum*** All. subsp. ***lucidum*** – H scap – Medit.

***Galium mollugo*** L. – H scap – S Europ.

***Galium odoratum*** (L.) Scop. – G rhiz – Eurosib.

***Galium parisiense*** L. – T scap – W Europ./Medit.

***Galium verum*** L. subsp. ***verum*** – H scap – Eurosib.

***Sherardia arvensis*** L. – T scap – Medit.

Gentianaceae

***Blackstonia perfoliata*** (L.) Huds. subsp. ***perfoliata*** – T scap – W Europ./Medit.

***Centaurium erythraea*** Rafn subsp. ***erythraea*** – H bienn – Eurasiat.

****Gentiana cruciata*** L. subsp. ***cruciata*** – H scap – Europ./W Asiat.

****Gentiana utriculosa*** L. – T scap – S Europ. mont.

***Gentiana verna*** L. subsp. ***verna*** – H ros – S Europ. mont.

**E *Gentianella columnae*** (Ten.) Holub – H bienn – Endem.

Conservation status: LC (Least concern) (Orsenigo et al. 2018).

***Gentianopsis ciliata*** (L.) Ma subsp. ***ciliata*** – T scap – S Europ. mont.

Apocynaceae

***Vinca minor*** L. – Ch rept – Europ./W Asiat.

***Vincetoxicum hirundinaria*** Medik. subsp. ***hirundinaria*** – H scap – Eurasiat.

Boraginaceae

***Aegonychon purpurocaeruleum*** (L.) Holub – H scap – S Europ./W Asiat.

***Buglossoides arvensis*** (L.) I.M.Johnst. subsp. ***arvensis*** – T scap – S Europ./W Asiat.

**E *Cynoglossum apenninum*** L. – H bienn – Endem.

Conservation status: LC (Least concern) (Orsenigo et al. 2018).

**E *Cynoglossum magellense*** Ten. – Ch suffr – Endem.

Conservation status: LC (Least concern) (Orsenigo et al. 2018).

***Cynoglosum montanum*** L. – H bienn – Medit./W Asiat.

***Cynoglossum officinale*** L. – H bienn – Eurasiat.

***Cynoglottis barrelieri*** (All.) Vural &Kit Tan subsp. ***barrelieri*** – H scap – Medit. mont.

***Echium vulgare*** L. subsp. ***vulgare*** – H bienn – Medit./W Asiat.

***Myosotis arvensis*** (L.) Hill subsp. ***arvensis*** – T scap – Europ.

**E *Myosotis decumbens*** Host subsp. ***florentina*** Grau – H scap – Endem.

Conservation status: DD (Data deficient) (Orsenigo et al. 2018).

**E *Myosotis graui*** Selvi – H scap – Endem.

Note: this species was recorded by Ballelli and Francalancia (1982) under both the names *M. alpestris and M. ambigens.*

Conservation status: LC (Least concern) (Orsenigo et al. 2018).

***Myosotis incrassata*** Guss. – T scap – Medit.

***Myosotis ramosissima*** Rochel subsp. ***ramosissima*** – T scap – Europ./SW Asiat.

***Myosotis sylvatica*** Hoffm. subsp. ***sylvatica*** – H scap – Europ.

****Pulmonaria hirta*** L. – G rhiz – W Alp./Appenn.

**E *Pulmonaria vallarsae*** A.Kern. subsp. ***apennina*** (Cristof. &Puppi) L. Cecchi &Selvi – H scap – Endem.

Conservation status: LC (Least concern) (Orsenigo et al. 2018).

Convolvulaceae

***Convolvulus arvensis*** L. – G rhiz – S Europ./W Asiat.

****Convolvulus cantabrica*** L. – H scap – Medit.

***Cuscuta epithymum*** (L.) L. subsp. ***epithymum*** – T par – Eurasiat.

***Cuscuta europaea*** L. – T par – Eurasiat.

****Fallopia dumetorum*** (L.) Holub – G rhiz – Eurasiat.

Oleaceae

***Fraxinus excelsior*** L. subsp. ***excelsior*** – P scap – Europ.

***Fraxinus ornus*** L. subsp. ***ornus*** – P scap – S Europ./W Asiat.

***Ligustrum vulgare*** L. – NP – Europ./W Asiat.

Plantaginaceae

***Chaenorhinum minus*** (L.) Lange subsp. ***minus*** – T scap – Medit.

***Cymbalaria muralis*** G.Gaertn., B.Mey. &Scherb. subsp. ***muralis*** – H caesp – Europ./NW Afr.

***Digitalis ferruginea*** L. – H scap – Medit. mont.

**E *Digitalis micrantha*** Roth ex Schweigg. – H scap – Endem.

Conservation status: LC (Least concern) (Orsenigo et al. 2020).

***Globularia bisnagarica*** L. – H scap – S Europ.

***Globularia meridionalis*** (Podp.) O.Schwarz – Ch rept – Anfiadr.

***Linaria vulgaris*** Mill. subsp. ***vulgaris*** – H scap – Eurasiat.

***Plantago argentea*** Chaix subsp. ***argentea*** – H scap – S Europ. mont.

***Plantago lanceolata*** L. – H scap – Eurasiat.

***Plantago major*** L. – H scap – Eurosib.

***Plantago media*** L. subsp. ***media*** – H scap – Eurosib.

***Plantago sempervirens*** Crantz – Ch suffr – SW Europ.

***Veronica arvensis*** L. – T scap – Medit.

***Veronica beccabunga*** L. subsp. ***beccabunga*** – H rept – Eurasiat.

***Veronica chamaedrys*** L. subsp. ***chamaedrys*** – H scap – Eurasiat.

***Veronica hederifolia*** L. – T scap – Eurasiat.

***Veronica montana*** L. – H scap – Europ./NW Afr.

***Veronica officinalis*** L. – H scap – Eurosib./N Amer.

***Veronica orsiniana*** Ten. – H scap – S Europ. mont.

***Veronica serpyllifolia*** L. – H scap – Eurosib.

Scrophulariaceae

***Scrophularia canina*** L. – H scap – Medit.

***Scrophularia scopolii*** Hoppe ex Pers. – H scap – Eurasiat. mont.

***Scrophularia umbrosa*** Dumort. subsp. ***umbrosa*** – H scap – Eurasiat.

***Verbascum densiflorum*** Bertol. – H bienn – Europ./W Asiat.

***Verbascum longifolium*** Ten. – H scap – SE Europ. mont.

***Verbascum lychnitis*** L. – H bienn – Eurasiat.

***Verbascum thapsus*** L. subsp. ***thapsus*** – H bienn – Eurasiat.

Lamiaceae

***Ajuga reptans*** L. – H rept – Europ./W Asiat.

****Ballota nigra*** L. subsp. ***meridionalis*** (Bég.) Bég. – H scap – Medit.

***Betonica officinalis*** L. – H scap – W Europ./Medit.

****Clinopodium nepeta*** (L.) Kuntze subsp. ***nepeta*** – H scap – Medit.

***Clinopodium menthifolium*** (Host) Stace subsp. ***menthifolium*** – H scap – Europ./Caucas.

Note: this species was recorded by Ballelli and Francalancia (1982) under the name *Calamintha nepeta* subsp. *glandulosa.*

***Clinopodium vulgare*** L. subsp. ***vulgare*** – H scap – Eurasiat./N Amer.

***Galeopsis angustifolia*** Ehrh. ex Hoffm. subsp. ***angustifolia*** – T scap – S Europ.

***Glechoma hirsuta*** Waldst. &Kit. – H rept – SE Europ.

****Lamium amplexicaule*** L. – T scap – Eurasiat.

***Lamium bifidum*** Cirillo subsp. ***balcanicum*** Velen. – T scap – SE Europ. mont.

***Lamium bifidum*** Cirillo subsp. ***bifidum*** – T scap – Medit.

***Lamium garganicum*** L. subsp. ***longiflorum*** (Ten.) Kerguélen – H scap – Medit. mont.

***Lamium maculatum*** (L.) L. – H scap – Europ./W Asiat.

***Lamium purpureum*** L. – T scap – Europ./W Asiat.

***Marrubium incanum*** Desr. – H scap – Medit.

***Melittis melissophyllum*** L. subsp. ***melissophyllum*** – H scap – Europ.

***Mentha longifolia*** (L.) L. – H scap – Eurasiat.

***Nepeta nepetella*** L. subsp. ***nepetella*** – H scap – Medit.

****Origanum vulgare*** L. subsp. ***vulgare*** – H scap – Eurasiat.

***Prunella laciniata*** (L.) L. – H scap – Medit.

***Prunella vulgaris*** L. subsp. ***vulgaris*** – H scap – Eurasiat.

***Salvia glutinosa*** L. – H scap – Eurasiat.

****Salvia pratensis*** L. subsp. ***pratensis*** – H scap – Medit.

Note: this species was recorded by Ballelli and Francalancia (1982) under the name *S. pratensis* subsp. *haematodes* (some collected specimens might belong to this taxon, but need further investigation).

***Salvia verbenaca*** L. – H scap – Medit.

*****Salvia virgata*** Jacq. – H scap – SE Europ.

***Satureja montana*** L. subsp. ***montana*** – Ch suffr – Medit. mont.

***Scutellaria columnae*** All. subsp. ***columnae*** – H scap – Medit. mont.

****Stachys annua*** (L.) L. subsp. ***annua*** – T scap – Medit.

***Stachys recta*** L. subsp. ***grandiflora*** – H scap – E Alp./Apenn.

****Stachys recta*** L. subsp. ***recta*** – H scap – Medit. mont.

***Stachys sylvatica*** L. – H scap – Eurosib.

***Stachys tymphaea*** Hausskn. – H scap – Medit. mont.

Note: this species was recorded by Ballelli and Francalancia (1982) under the name *S. germanica.*

***Teucrium capitatum*** L. subsp. ***capitatum*** – Ch suffr – Medit.

***Teucrium chamaedrys*** L. subsp. ***chamaedrys*** – Ch suffr – Medit.

***Teucrium flavum*** L. subsp. ***flavum*** – Ch suffr – Medit.

***Teucrium montanum*** L. – Ch suffr – S Europ.

***Thymus longicaulis*** C.Presl subsp. ***longicaulis*** – Ch rept – S Europ.

***Thymus moesiacus*** Velen. – Ch rept – SE Europ.

***Ziziphora granatensis*** (Boiss. &Reut.) Melnikov subsp. ***alpina*** (L.) Bräuchler &Gutermann – Ch suffr – S Europ. mont.

Orobanchaceae

***Euphrasia liburnica*** Wettst. – T scap – SE Europ.

***Euphrasia salisburgensis*** Funck ex Hoppe – T scap – S Europ. mont.

***Euphrasia stricta*** D.Wolff ex J. F.Lehm. – T scap – Eurosib.

***Lathraea squamaria*** L. – G rhiz – Eurasiat.

***Odontites luteus*** (L.) Clairv. subsp. ***luteus*** – T scap – Medit.

***Orobanche alba*** Stephan ex Willd. – T par – Eurasiat.

***Orobanche caryophyllacea*** Sm. – T par – Eurasiat.

***Orobanche gracilis*** Sm. – T par – S Europ.

***Orobanche hederae*** Vaucher ex Duby – T par – Medit.

***Orobanche minor*** Sm. – T par – S Europ./W Asiat.

***Rhinanthus alectorolophus*** (Scop.) Pollich subsp. ***alectorolophus*** – T scap – Europ.

***Rhinanthus minor*** L. – T scap – Eurosib.

Verbenaceae

***Verbena officinalis*** L. – H scap – Eurasiat./N Afr.

Aquifoliaceae

***Ilex aquifolium*** L. – P scap – Europ./SW Asiat.

Campanulaceae

****Campanula bononiensis*** L. – H scap – Eurasiat.

***Campanula glomerata*** L. – H scap – Eurasiat.

Note: in this species is included *C. glomerata* subsp. *elliptica* (Ballelli and Francalancia 1982).

**E *Campanula micrantha*** Bertol. – H scap – Endem.

Conservation status: LC (Least concern) (Orsenigo et al. 2018).

***Campanula rapunculus*** L. – H bienn – Eurasiat.

**E *Campanula tanfanii*** Podlech – H scap – Endem.

Conservation status: LC (Least concern) (Orsenigo et al. 2018).

***Campanula trachelium*** L. subsp. ***trachelium*** – H scap – Eurasiat.

***Legousia hybrida*** (L.) Delarbre – T scap – Medit.

***Legousia speculum-veneris*** (L.) Chaix subsp. ***speculum-veneris*** – T scap – Medit.

Asteraceae

***Achillea collina*** (Becker ex Wirtg.) Heimerl – H scap – SE Europ.

****Achillea distans*** Waldst. &Kit. ex Willd. subsp. ***stricta*** (Gremli) Janch. – H scap – SE Europ. mont.

****Achillea millefolium*** L. subsp. ***millefolium*** – H scap – Eurosib.

****Achillea setacea*** Waldst. &Kit. – H scap – SE Europ.

**E *Adenostyles australis*** (Ten.) Iamonico &Pignatti – H scap – Endem.

Conservation status: LC (Least concern) (Orsenigo et al. 2018).

***Anthemis arvensis*** L. subsp. ***arvensis*** – T scap – Medit.

****Anthemis arvensis*** L. subsp. ***incrassata*** (Loisel.) Nyman – T scap – Medit.

***Anthemis cotula*** L. – T scap – Eurasiat.

***Arctium lappa*** L. – H scap – Eurasiat.

****Arctium minus*** (Hill) Bernh. – H bienn – Europ.

***Arctium nemorosum*** Lej. – H bienn – Europ.

A NAT ****Artemisia absinthium*** L. – Ch suffr – Eurasiat.

***Artemisia alba*** Turra – Ch suffr – Medit.

A CAS ****Artemisia verlotiorum*** Lamotte – H scap – E Asiat.

****Artemisia vulgaris*** L. – H scap – Eurasiat.

***Bellis perennis*** L. – H scap – Europ.

***Bellis sylvestris*** Cirillo – H scap – Medit.

***Bombycilaena erecta*** (L.) Smoljan. – T scap – Medit.

***Carduus defloratus*** L. subsp. ***carlinifolius*** (Lam.) Ces. – H scap – SW Europ. mont.

****Carduus nutans*** L. subsp. ***micropterus*** (Borbás) Hayek – H bienn – Medit.

***Carduus nutans*** L. subsp. ***nutans*** – H bienn – Europ.

***Carduus personata*** (L.) Jacq. subsp. ***personata*** – H scap – S Europ. mont.

***Carduus pycnocephalus*** L. subsp. ***pycnocephalus*** – H bienn – Medit.

***Carlina acanthifolia*** All. subsp. ***acanthifolia*** – H ros – SW Europ. mont.

***Carlina acaulis*** L. subsp. ***caulescens*** (Lam.) Schübl. &G.Martens – H ros – S Europ. mont.

***Carlina vulgaris*** L. subsp. ***vulgaris*** – H scap – Europ.

**E *Centaurea arrigonii*** Greuter – H scap – Endem.

Note: this species was recorded by Ballelli and Francalancia (1982) under the name *C. ambigua* subsp. *nigra.*

Conservation status: DD (Data deficient) (Orsenigo et al. 2018).

***Centaurea jacea*** L. subsp. ***gaudinii*** (Boiss. &Reut.) Gremli – H scap – SE Europ. mont.

**E *Centaurea nigrescens*** Willd. subsp. ***neapolitana*** (Boiss.) Dostál – H scap – Endem.

Conservation status: DD (Data deficient) (Orsenigo et al. 2018).

***Centaurea scabiosa*** L. subsp. ***scabiosa*** – H caesp – Eurasiat.

***Centaurea******triumfettii*** All. – H scap – S Europ./W Asiat.

****Cichorium intybus*** L. – H scap – Eurasiat.

***Cirsium arvense*** (L.) Scop. – G rad – Eurasiat.

**E** ****Cirsium lobelii*** Ten. – H bienn – Endem.

Conservation status: DD (Data deficient) (Orsenigo et al. 2018).

***Cirsium morisianum*** Rchb.f. – H scap – W Alp./Appenn.

*****Cirsium vulgare*** (Savi) Ten. subsp. ***vulgare*** – H bienn – Eurasiat.

Conservation status: DD (Data deficient) (Orsenigo et al. 2020).

***Cota tinctoria*** (L.) J.Gay subsp. ***australis*** (R.Fern.) Oberpr. &Greuter – H bienn – Europ.

***Crepis lacera*** Ten. subsp. ***lacera*** – H scap – Subendem.

***Crepis leontodontoides*** All. – H scap – Medit. mont.

***Crepis neglecta*** L. subsp. ***neglecta*** – T scap – Medit.

A CAS ***Crepis sancta*** (L.) Bornm. subsp. ***nemausensis*** (P.Fourn.) Babc. – T scap – Medit./W Asiat.

Note: this species was recorded by Ballelli and Francalancia (1982) under the name *C. sancta* subsp. *sancta.*

***Crepis setosa*** Haller.f. – T scap – Medit.

***Crepis vesicaria*** L. – H bienn – W Europ./Medit.

***Crupina vulgaris*** Cass. – T scap – S Europ./W Asiat.

***Doronicum columnae*** Ten. – G rhiz – SE Europ. mont.

***Echinops sphaerocephalus*** L. subsp. ***sphaerocephalus*** – H scap – Eurasiat.

***Eupatorium cannabinum*** L. subsp. ***cannabinum*** – H scap – Eurasiat.

****Filago pyramidata*** L. – T scap – Medit./SW Asiat.

***Helichrysum italicum*** (Roth) G.Don subsp. ***italicum*** – Ch suffr – S Europ.

****Hieracium bifidum*** Kit. ex Hornem. subsp. ***caesiiflorum*** (Norrl.) Zahn – H ros – Europ.

****Hieracium bifidum*** Kit. *ex* Hornem. subsp. ***stenolepis*** (Lindeb.) Zahn – H ros – Europ.

**E*******Hieracium bifidum*** Kit. ex Hornem. subsp. ***subimbricatum*** Gottschl. – H ros – Endem.

*****Hieracium*** ***caesioides*** Arv.-Touv. *s.l.* – H scap – W Alp./Appenn.

**E******Hieracium glaucinum*** Jord. subsp. ***pseudobasalticum*** Gottschl. – H ros – Endem.

**E******Hieracium hypochoeroides*** S.Gibson subsp. ***pallidopsis*** Gottschl. – H scap – Endem.

****Hieracium jurassicum*** Griseb. subsp. ***subperfoliatum*** (Arv.-Touv.) Greuter – H scap – Europ.

**E*******Hieracium murorum*** L. subsp. ***anisobasis*** Gottschl. – H scap – Endem.

Note: this species was recorded by Ballelli and Francalancia (1982) under the name *H. sylvaticum.*

**E*******Hieracium murorum*** L. subsp. ***heteroserratum*** Gottschl. – H scap – Endem.

Note: this species was recorded by Ballelli and Francalancia (1982) under the name *H. sylvaticum.*

**E*******Hieracium pietrae*** Zahn – H scap – Endem.

Conservation status: DD (Data deficient) (Orsenigo et al. 2018).

***Hieracium prenanthoides*** Vill. ***prenanthoides*** – H scap – Europ./W Asiat.

**E******Hieracium racemosum*** Waldst. &Kit. ex Willd. subsp. ***caramanicum*** (Zahn) Zahn – H scap – Endem.

***Hieracium racemosum*** Waldst. &Kit. ex Willd. subsp. ***crinitum*** (Sm.) Rouy – H scap – Europ./W Asiat.

****Hieracium racemosum*** Waldst. &Kit. ex Willd. subsp. ***virgaurea*** (Coss.) Zahn – H scap – Subendem.

***Jacobaea erratica*** (Bertol.) Fourr. – H bienn – S Europ.

***Jacobaea erucifolia*** (L.) G.Gaertn., B.Mey. &Scherb. subsp. ***erucifolia*** – H scap – Eurasiat.

***Lactuca perennis*** L. – H scap – Europ.

***Lactuca viminea*** (L.) J.Presl &C.Presl subsp. ***viminea*** – H bienn – Medit.

***Lactuca virosa*** L. – H bienn – Medit.

***Lapsana communis*** L. subsp. ***communis*** – T scap – Eurasiat.

***Leontodon crispus*** Vill. – H ros – S Europ.

***Leontodon hispidus*** L. subsp. ***hispidus*** – H ros – Europ.

****Leontodon rosanoi*** (Ten.) DC. – H ros – Medit.

***Leucanthemum vulgare*** (Vaill.) Lam. subsp. ***vulgare*** – H scap – Eurasiat.

***Mycelis muralis*** (L.) Dumort. subsp. ***muralis*** – H scap – Eurasiat.

***Omalotheca sylvatica*** (L.) Sch.Bip. &F.W.Schultz – H scap – Eurosib./N Amer.

***Pentanema montanum*** (L.) D.Gut.Larr., Santos-Vicente, Anderb., E.Rico & M.M.Mart.Ort. – H scap – Medit.

***Pentanema squarrosum*** (L.) D.Gut.Larr., Santos- Vicente, Anderb., E.Rico & M.M.Mart.Ort. – H bienn – Eurasiat./N Amer.

***Petasites hybridus*** (L.) G.Gaertn., B.Mey. &Scherb. subsp. ***hybridus*** – G rhiz – Eurasiat.

***Picris hieracioides*** L. subsp. ***hieracioides*** – H bienn – Eurasiat.

***Pilosella cymosa*** (L.) F.W.Schultz &Sch.Bip. subsp. ***sabina*** (Sebast.) H.P. Fuchs – H scap – Europ.

****Pilosella cymosa*** subsp. ***cymosa*** × ***P. cymosa*** subsp. ***sabina*** – H ros – Europ.

*****Pilosella densiflora*** (Tausch) Soják – H ros – Europ.

***Pilosella officinarum*** Vaill. – H ros – Eurosib.

***Prenanthes purpurea*** L. – H scap – Europ.

****Pseudopodospermum hispanicum*** (L.) Zaika, Sukhor. & N.Kilian subsp. ***asphodeloides*** (Wallr.) Bartolucci, Galasso & Conti – H scap – S Europ./S Siber.

Note: the nomenclature of this taxon follows Bartolucci et al. (2020).

***Ptilostemon strictus*** (Ten.) Greuter – H scap – SE Europ.

***Pulicaria dysenterica*** (L.) Bernh. – H scap – Medit.

***Reichardia picroides*** (L.) Roth – H scap – Medit.

***Rhagadiolus stellatus*** (L.) Gaertn. – T scap – Medit.

***Scorzoneroides cichoriacea*** (Ten.) Greuter – H ros – Medit. mont.

**E *Senecio apenninus*** Tausch – H scap – Endem.

Note: this species was recorded by Ballelli and Francalancia (1982) under the name *S. doronicum* subsp. *gerardi.*

Conservation status: LC (Least concern) (Conti et al. 2019).

***Senecio doronicum*** (L.) L. subsp. ***doronicum*** – H scap – S Europ. mont.

***Senecio ovatus*** (G.Gaertn., B.Mey. &Scherb.) Willd. subsp. ***alpestris*** (Gaudin) Herborg – H scap – Europ. mont.

Note: this species was recorded by Ballelli and Francalancia (1982) under the name *S. fuchsii.*

**E **Senecio scopolii*** Hoppe &Hornsch. subsp. ***floccosus*** (Bertol.) Greuter – H ros – Endem.

Conservation status: LC (Least concern) (Orsenigo et al. 2018).

***Senecio vulgaris*** L. subsp. ***vulgaris*** – T scap – S Europ.

***Solidago virgaurea*** L. subsp. ***virgaurea*** – H scap – Eurosib./N Amer.

****Sonchus*** ***asper*** (L.) Hill subsp. ***asper*** – T scap – Eurasiat.

***Tanacetum corymbosum*** (L.) Sch.Bip. subsp. ***achilleae*** (L.) Greuter – H scap – SE Europ.

Note: this species was recorded by Ballelli and Francalancia (1982) under the name *T. corymbosum* var. *tenuifolium.*

******Taraxacum calocarpum*** Sonck – H ros – Subendem.

*****Taraxacum parnassicum*** Dahlst. – H ros – S Europ. mont.

*****Taraxacum perincisum***(Murr) Murr – H ros – Europ.

******Taraxacum pulchrifolium*** Markl. – H ros – Europ.

*****Taraxacum rubicundum*** (Dahlst.) Dahlst. – H ros – Europ.

***Taraxacum*** sect. ***Taraxacum*** F.H.Wigg. – H ros – Eurosib.

Note: the species belonging to this section were recorded by Ballelli and Francalancia (1982) under the name *T. officinale* s.l.

**E *Tephroseris italica*** Holub – H ros – Endem.

Conservation status: LC (Least concern) (Orsenigo et al. 2018).

****Tragopogon crocifolius*** L. subsp. ***crocifolius*** – H scap – Medit.

***Tragopogon orientalis*** L. – H scap – Eurasiat.

****Tragopogon pratensis*** L. – H scap – Eurasiat.

***Tragopogon samaritanii*** Heldr. &Sartori ex Boiss. – H bienn – SE Europ.

***Tussilago farfara*** L. – G rhiz – Eurasiat.

***Xeranthemum cylindraceum*** Sm. – T scap – S Europ./W Asiat.

***Xeranthemum inapertum*** (L.) Mill. – T scap – S Europ./W Asiat.

Viburnaceae

***Adoxa moschatellina*** L. subsp. ***moschatellina*** – G rhiz – Eurasiat./N Amer.

***Sambucus ebulus*** L. – G rhiz – Europ./W Asiat.

***Sambucus nigra*** L. – P caesp – Europ.

***Viburnum lantana*** L. – P caesp – Europ./W Asiat.

***Viburnum tinus*** L. subsp. ***tinus*** – P caesp – Medit.

Caprifoliaceae

***Lonicera caprifolium*** L. – P lian – SE Europ.

***Lonicera etrusca*** Santi – P lian – Medit.

***Lonicera xylosteum*** L. – P caesp – Eurosib.

Valerianaceae

***Valeriana officinalis*** L. subsp. ***officinalis*** – H scap – SE Europ.

***Valeriana tripteris*** L. subsp. ***tripteris*** – H scap – S Europ. mont.

***Valeriana tuberosa*** L. – H scap – S Europ.

***Valerianella carinata*** Loisel. – T scap – W Europ./Medit.

***Valerianella eriocarpa*** Desv. – T scap – Medit.

***Valerianella locusta*** (L.) Laterr. – T scap – W Europ./Medit.

Dipsacaceae

**E** ***Knautia calycina*** (C.Presl) Guss. – H scap – Endem.

Note: this species was recorded by Ballelli and Francalancia (1982) under the name*K. arvensis* and by Ballelli and Francalancia (1987) under the name*K. purpurea.*

Conservation status: LC (Least concern) (Orsenigo et al. 2018).

***Scabiosa columbaria*** L. subsp. ***columbaria*** – H scap – Europ.

Araliaceae

***Hedera helix*** L. subsp. ***helix*** – P lian – Europ./SW Asiat.

Apiaceae

***Aegopodium podagraria*** L. – G rhiz – Eurosib.

***Bunium bulbocastanum*** L. – G bulb – SW Europ.

***Bupleurum baldense*** Turra – T scap – Medit./W Asiat.

***Bupleurum falcatum*** L. subsp. ***cernuum*** (Ten.) Arcang. – H scap – S Europ. mont.

***Chaerophyllum aureum*** L. – H scap – Europ. mont.

***Chaerophyllum nodosum*** (L.) Crantz – T scap – Medit.

***Chaerophyllum temulum*** L. – H bienn – Europ.

***Daucus carota*** L. subsp. ***carota*** – H bienn – Medit.

****Dichoropetalum carvifolium-chabraei*** (Crantz) Soldano, Galasso &Banfi – H scap – Europ.

***Eryngium amethystinum*** L. – H scap – Medit.

***Heracleum sibiricum*** L. subsp. ***sibiricum*** – H scap – Eurosib.

***Heracleum sibiricum*** L. subsp. ***ternatum*** (Velen.) Briq. – H scap – SE Europ. mont.

***Katapsuxis silaifolia*** (Jacq.) Reduron, Charpin & Pimenov – H scap – S Europ.

***Laserpitium latifolium*** L. – H scap – Europ.

***Opopanax chironium*** (L.) W.D.J.Koch – H scap – Medit.

***Orlaya*** ***platycarpos*** W.D.J.Koch – T scap – Medit.

***Pastinaca sativa*** L. subsp. ***urens*** (Req. ex Godr.) Čelak. – H bienn – S Europ.

***Pimpinella major*** (L.) Huds. – H scap – Europ.

***Pteroselinum austriacum*** (Jacq.) Rchb. – H scap – S Europ. mont.

***Sanicula europaea*** L. – H scap – Europ./W Asiat.

***Seseli libanotis*** (L.) W.D.J.Koch – H scap – Europ.

**E *Siler montanum*** Crantz subsp. ***siculum*** (Spreng.) Iamonico, Bartolucci &F.Conti – H scap – Endem.

Note: this species was recorded by Ballelli and Francalancia (1982) under the name *Laserpitium garganicum* subsp. *garganicum.*

Conservation status: LC (Least concern) (Orsenigo et al. 2018).

***Smyrnium perfoliatum*** L. subsp. ***perfoliatum*** – H bienn – Medit.

****Tordylium maximum*** L. – T scap – Medit.

***Torilis africana*** Spreng. – T scap – Medit.

***Torilis japonica*** (Houtt.) DC. – T scap – Europ.

***Trinia glauca*** (L.) Dumort. subsp. ***carniolica*** (A.Kern. ex Janch.) H.Wolff – H scap – SE Europ. mont.

Note: this species was recorded by Ballelli and Francalancia (1982) under the name *T. glauca* subsp. *glauca.*

**Table 1**

List of the Italian endemic taxa found in the study area.

| **Endemic species** | **Conservation status** | **Reference** |
| --- | --- | --- |
| *Ophrys classica* Devillers-Tersch. & Devillers | LC | Orsenigo et al. 2018 |
| *Ornithogalum etruscum* Parl. subsp. *etruscum* | LC | Orsenigo et al. 2018 |
| *Ornithogalum orthophyllum* Ten. | DD | Orsenigo et al. 2018 |
| *Helictochloa praetutiana* (Parl. ex Arcang.)Bartolucci, F.Conti, Peruzzisubsp. *praetutiana* | LC | Orsenigo et al. 2018 |
| *Koeleria splendens* C.Presl | LC | Orsenigo et al. 2018 |
| *Sesleria italica* (Pamp.) Ujhelyi | LC | Orsenigo et al. 2018 |
| *Sesleria nitida* Ten subsp*. nitida* | LC | Orsenigo et al. 2018 |
| *Stipa dasyvaginata* Martinovský subsp. *apenninicola* Martinovský & Moraldo | LC | Orsenigo et al. 2018 |
| *Trisetaria villosa* (Bertol.) Banfi & Soldano | LC | Orsenigo et al. 2018 |
| *Helleborus viridis* L. subsp. *bocconei* (Ten.) Peruzzi | LC | Orsenigo et al. 2018 |
| *Ranunculus apenninus* (Chiov.) Pignatti | LC | Orsenigo et al. 2018 |
| *Ranunculus pollinensis* (N.Terracc.) Chiov. | LC | Orsenigo et al. 2018 |
| *Paeonia officinalis* L. subsp. *italica* N.G.Passal. & Bernardo | LC | Orsenigo et al. 2018 |
| *Potentilla rigoana* Th.Wolf | LC | Orsenigo et al. 2018 |
| *Euphorbia gasparrinii* Boiss. subsp*. samnitica* (Fiori) Pignatti | LC | Orsenigo et al. 2018 |
| *Viola eugeniae* Parl. subsp. *eugeniae* | LC | Orsenigo et al. 2018 |
| *Alyssum diffusum* Ten. subsp. *diffusum* | LC | Orsenigo et al. 2018 |
| *Erysimum apenninum* Peccenini & Polatschek | LC | Orsenigo et al. 2018 |
| *Erysimum pseudorhaeticum* Polatschek | LC | Orsenigo et al. 2018 |
| *Armeria gracilis* Ten. subsp. *gracilis* | DD | Orsenigo et al. 2018 |
| *Cerastium tomentosum* L. | LC | Orsenigo et al. 2018 |
| *Gentianella columnae* (Ten.) Holub | LC | Orsenigo et al. 2018 |
| *Cynoglossum apenninum* L. | LC | Orsenigo et al. 2018 |
| *Cynoglossum magellense* Ten. | LC | Orsenigo et al. 2018 |
| *Myosotis decumbens* Host subsp. *florentina* Grau | DD | Orsenigo et al. 2018 |
| *Myosotis graui* Selvi | LC | Orsenigo et al. 2018 |
| *Pulmonaria vallarsae* A.Kern. subsp. *apennina* | LC | Orsenigo et al. 2018 |
| *Digitalis micrantha* Roth ex Schweigg. | LC | Orsenigo et al. 2020 |
| *Campanula micrantha* Bertol. | LC | Orsenigo et al. 2018 |
| *Campanula tanfanii* Podlech | LC | Orsenigo et al. 2018 |
| *Adenostyles australis* (Ten.) Iamonico & Pignatti | LC | Orsenigo et al. 2018 |
| *Centaurea arrigonii* Greuter | DD | Orsenigo et al. 2018 |
| *Centaurea nigrescens* Willd. subsp. *neapolitana* (Boiss.) Dostál | DD | Orsenigo et al. 2018 |
| *Cirsium lobelii* Ten. | DD | Orsenigo et al. 2018 |
| *Hieracium bifidum* Kit. ex Hornem. subsp. *subimbricatum* Gottschl. | / | Non included in the red list |
| *Hieracium glaucinum* Jord. subsp. *pseudobasalticum* Gottschl. | / | Non included in the red list |
| *Hieracium hypochoeroides* S.Gibson subsp. *pallidopsis* Gottschl. | / | Non included in the red list |
| *Hieracium murorum* L. subsp. *anisobasis* Gottschl. | / | Non included in the red list |
| *Hieracium murorum* L. subsp. *heteroserratum* Gottschl. | / | Non included in the red list |
| *Hieracium pietrae* Zahn | DD | Orsenigo et al. 2018 |
| *Hieracium racemosum* Waldst. & Kit. ex Willd. subsp. *caramanicum* (Zahn) Zahn | / | Non included in the red list |
| *Senecio apenninus* Tausch | LC | Conti et al. 2019 |
| *Senecio scopolii* Hoppe & Hornsch. subsp. *floccosus* (Bertol.) Greuter | LC | Orsenigo et al. 2018 |
| *Tephroseris italica* Holub | LC | Orsenigo et al. 2018 |
| *Knautia calycina* (C.Presl) Guss. | LC | Orsenigo et al. 2018 |
| *Siler montanum* Crantz subsp. *siculum* (Spreng.) Iamonico, Bartolucci & F.Conti | LC | Orsenigo et al. 2018 |

**6. Table 2**

Alien species found at Montagna di Torricchio State Nature Reserve (Marche, Italy). The status and associated code in the study area, in Marche and in Italy for alien species follow Galasso et al. (2018). A (archaeophyte), N (neophyte), CAS (casual alien) NAT (naturalized alien) and INV (invasive alien).

| **Alien species** | **Torricchio** | **Marche** | **Italy** |
| --- | --- | --- | --- |
| *Agrostemma githago* L. subsp. *githago* | A CAS | A | A NAT |
| *Artemisia absinthium* L. | A NAT | A NAT | not alien |
| *Artemisia verlotiorum* Lamotte | A CAS | A INV | N INV |
| *Avena sativa* L. subsp. *sativa* | A CAS | A CAS | A CAS |
| *Crepis sancta* (L.) Bornm. subsp. *nemausensis* (P.Fourn.) Babc. | A CAS | A INV | N INV |
| *Galega officinalis* L. | A CAS | A NAT | A NAT |
| *Malus domestica* (Borkh.) Borkh. | A NAT | A NAT | A NAT |
| *Pinus nigra* J.F.Arnold subsp. *nigra* | A CAS | A NAT | not alien |
| *Pinus sylvestris* L. | A CAS | new | not alien |
| *Secale cereale* L. subsp. *cereale* | A CAS | A CAS | A CAS |
| *Setaria italica* (L.) P.Beauv. subsp. *viridis* (L.) Thell | Cryptogenic |  |  |

**7.** Images of the herbarium specimens kept in CAME of the two species new for Italy: a) *Taraxacum calocarpum* Sonck, b) *Taraxacum pulchrifolium* Markl.

a)


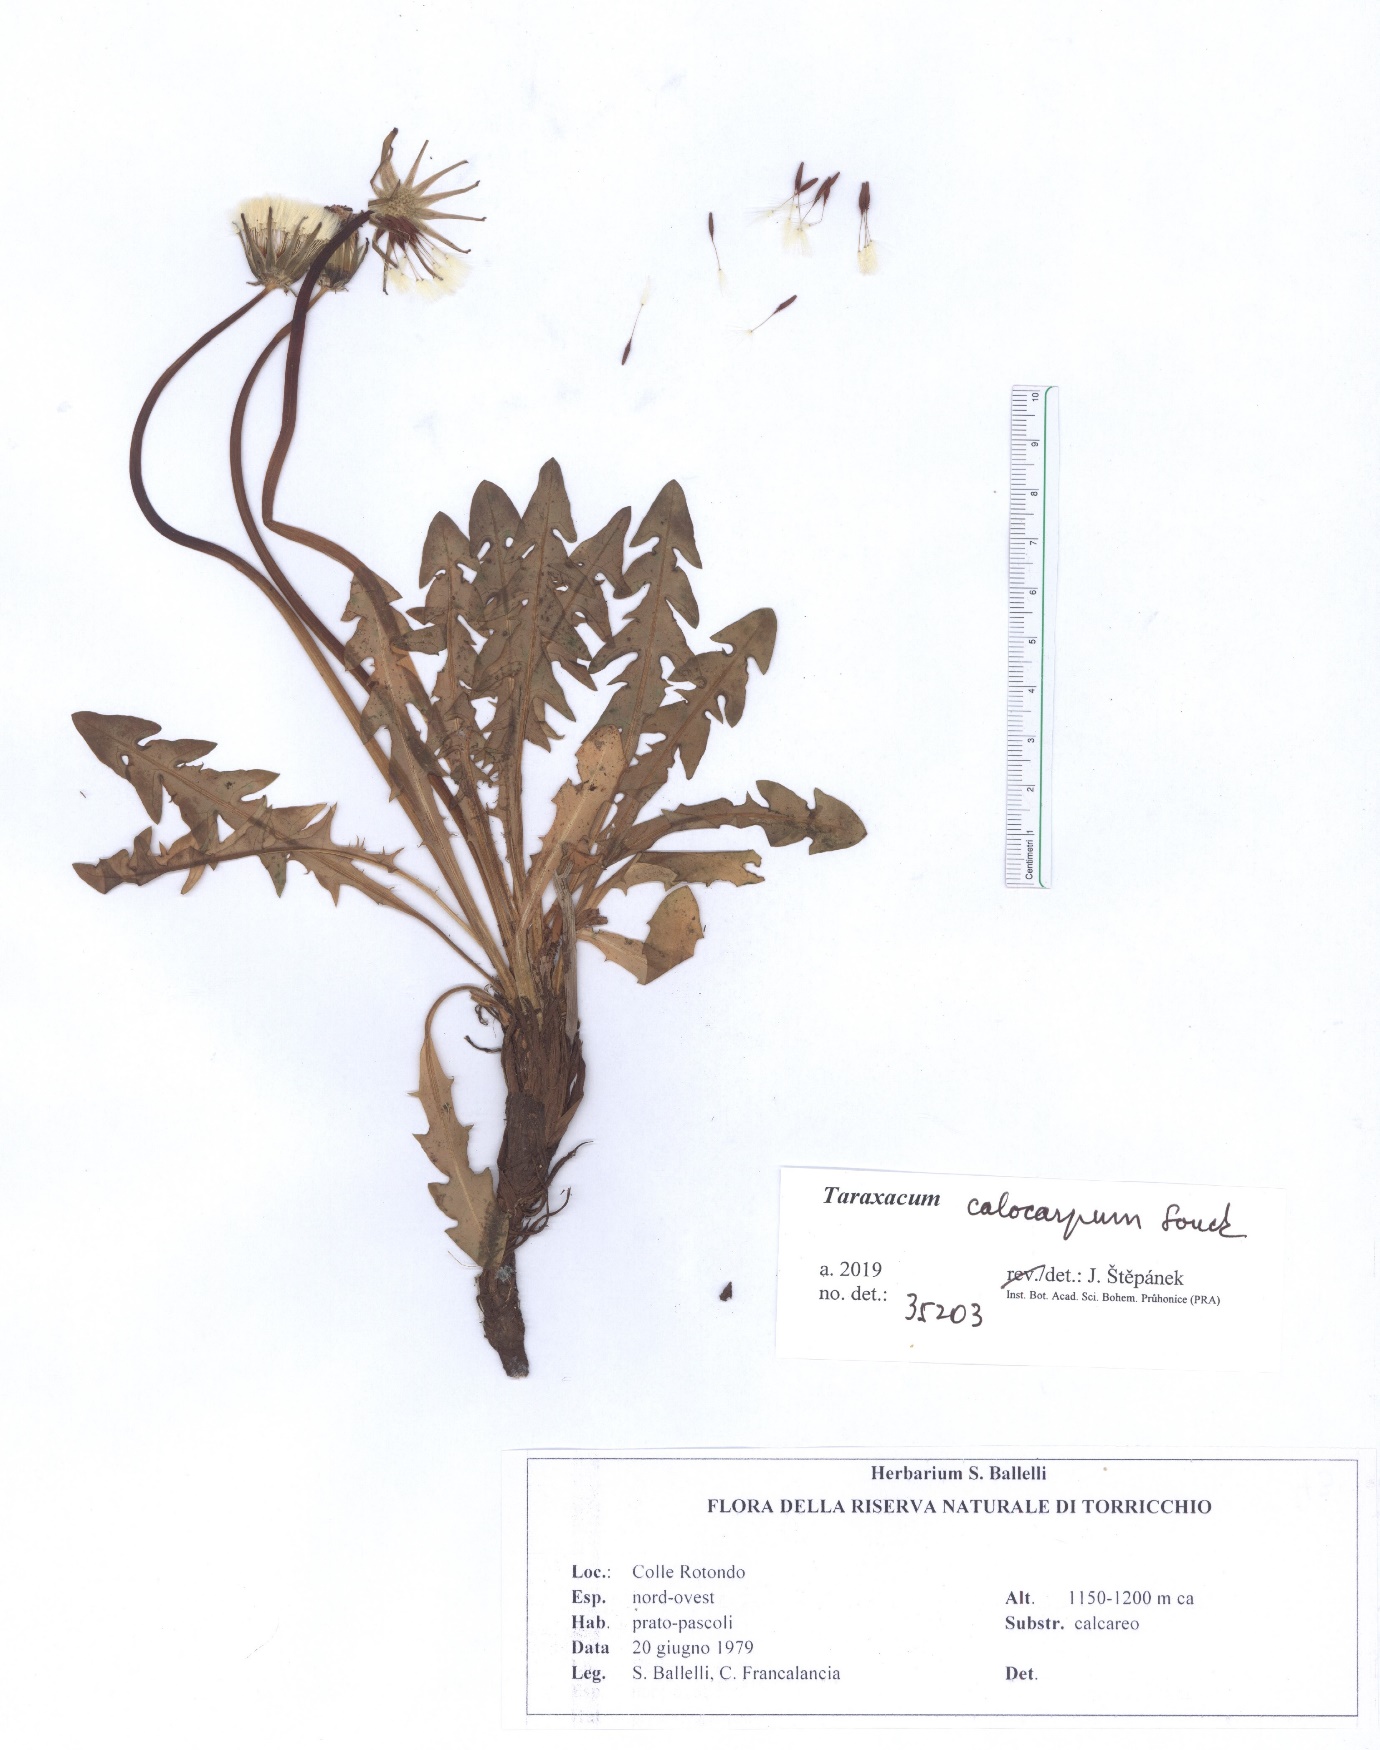


b)


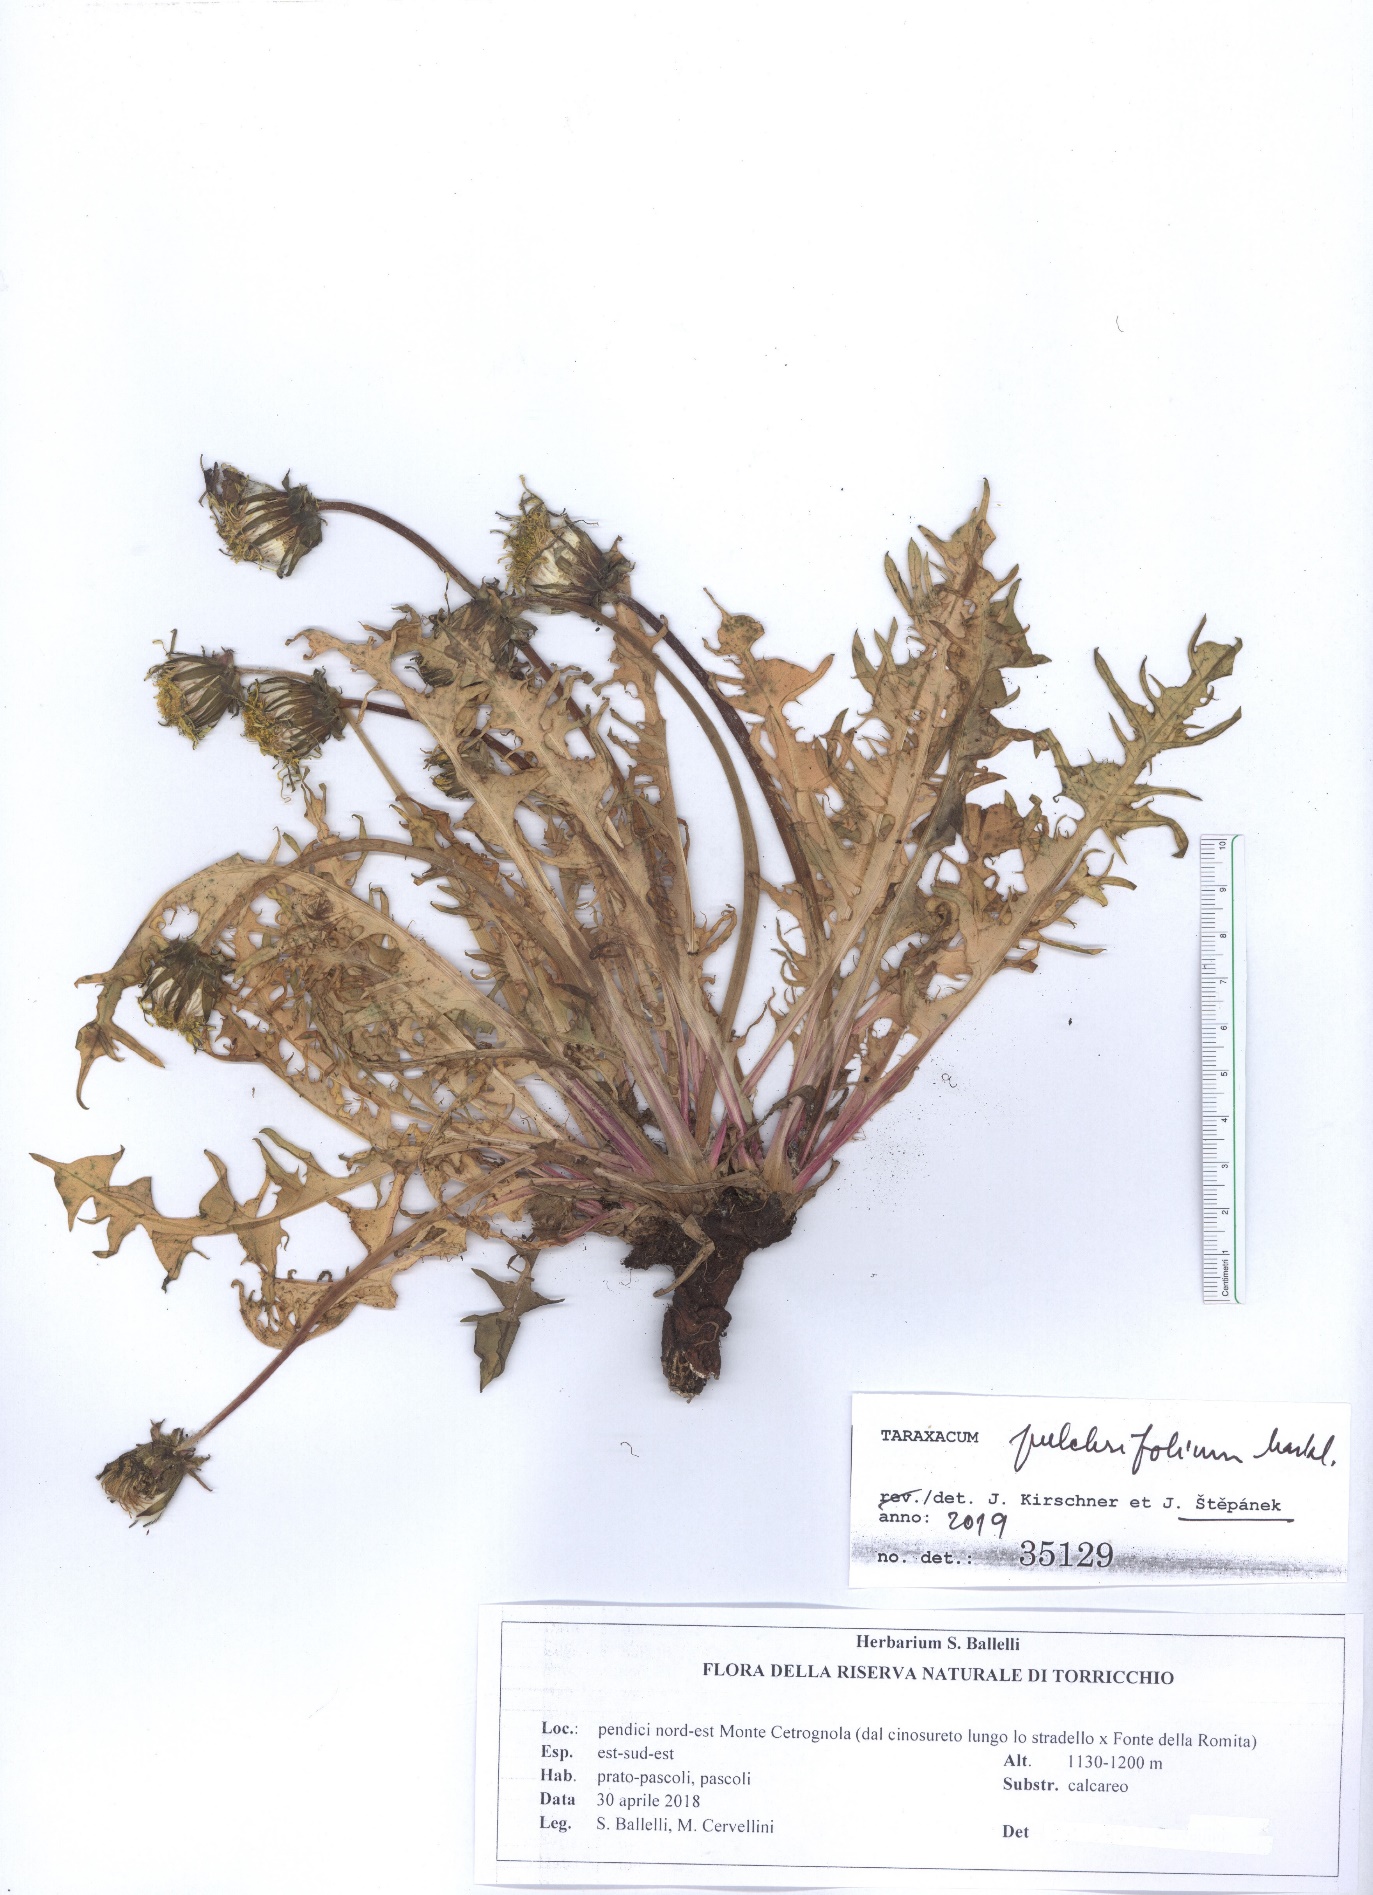


**8.** Life form spectrum.

| Life form | Sub-life form | Occurrence | % |
| --- | --- | --- | --- |
| Chamaephytes | fruticose | 1 | 0.1 |
|  | pulvinate | 3 | 0.4 |
|  | reptant | 5 | 0.6 |
|  | succulent | 6 | 0.8 |
|  | suffruticose | 35 | 4.4 |
| Geophytes | bulbous | 50 | 6.3 |
|  | radicigemmata | 2 | 0.3 |
|  | rhizomatous | 52 | 6.6 |
|  | parasitic | 1 | 0.1 |
| Hemicryptophytes | biennial | 32 | 4.1 |
|  | caespitose | 77 | 9.8 |
|  | reptant | 9 | 1.1 |
|  | rosulate | 41 | 5.2 |
|  | scandent | 1 | 0.1 |
|  | scapose | 241 | 30.5 |
| Nano-Phanerophytes |  | 20 | 2.5 |
| Phanerophytes | caespitose | 26 | 3.2 |
|  | lianas | 5 | 0.6 |
|  | scapose | 31 | 3.9 |
| Therophytes | caespitose | 1 | 0.1 |
|  | parasitic | 7 | 0.9 |
|  | reptant | 1 | 0.1 |
|  | scapose | 142 | 18.0 |
| Total |  | 789 | 100.0 |

**9.** Chorological spectrum**.**

| Chorological group | Chorotype | Occurrence | % |
| --- | --- | --- | --- |
| Endemic | Endemic | 46 | 5.8 |
|  | Subendemic | 4 | 0.5 |
| Mediterranean | Mediterranean | 162 | 20.5 |
|  | Montane Mediterranean | 27 | 3.4 |
| Atlantic | Western European/Mediterranean | 18 | 2.3 |
| European | European | 110 | 13.9 |
|  | Montane South-European | 45 | 5.7 |
|  | South-European | 31 | 3.9 |
|  | South-East-European | 19 | 2.4 |
|  | Montane South-East-European | 16 | 2.0 |
|  | Montane South-West-European | 7 | 0.9 |
|  | South-West European | 5 | 0.6 |
|  | Montane European | 1 | 0.1 |
|  | East-Alpine/Apennine | 1 | 0.1 |
|  | West-Alpine/Apennine | 4 | 0.5 |
|  | Montane South-East European /Mediterranean | 1 | 0.1 |
|  | Amphiadriatic | 2 | 0.3 |
|  | Illiric/Apennine | 1 | 0.1 |
|  | European/North-West African | 2 | 0.3 |
|  | European/North African | 2 | 0.3 |
| Eurasian | Mediterranean/West-Asian | 8 | 1.0 |
|  | Mediterranean/South-West Asian | 6 | 0.8 |
|  | Eurasian | 102 | 12.9 |
|  | Montane Eurasian | 1 | 0.1 |
|  | Eurasian/North African | 2 | 0.3 |
|  | Eurasian/African | 1 | 0.1 |
|  | European/West Asian | 42 | 5.3 |
|  | South European/West Asian | 15 | 1.9 |
|  | European/South-West Asian | 14 | 1.8 |
|  | South-East European/South-West Asian | 8 | 1.0 |
|  | South European/South-West Asian | 4 | 0.5 |
|  | South European/Asian | 2 | 0.3 |
|  | South-East European/ West Asian | 2 | 0.3 |
|  | Montane South-Eastern European/West Asian | 1 | 0.1 |
|  | South-East European/Asian | 1 | 0.1 |
|  | South European/South Siberian | 1 | 0.1 |
|  | European/North-West African/South-West Asian | 1 | 0.1 |
| Boreal | Eurosiberian | 31 | 3.9 |
|  | Eurasian/North-American | 12 | 1.5 |
|  | Eurosiberian/North-American | 6 | 0.8 |
|  | Eurasian/North-American/Australian | 2 | 0.3 |
|  | European/North-American | 2 | 0.3 |
|  | Eurasian/American | 1 | 0.1 |
|  | Arctic-Alpine | 1 | 0.1 |
| Wide distribution area | Cosmopolitan | 6 | 0.8 |
|  | Subcosmopolitan | 7 | 0.9 |
| Asian | Asian | 1 | 0.1 |
|  | South-Eastern Asian | 1 | 0.1 |
|  | Eastern Asian | 1 | 0.1 |
|  | South-Western Asian | 1 | 0.1 |
| Undefined |  | 2 | 0.3 |
| Total |  | 789 | 100.0 |

**References**

Ballelli S, Francalancia C (1982) La flora della Riserva naturale di Torricchio. La Riserva Naturale di Torricchio 5: 3–73.

Ballelli S, Francalancia C (1987) Dati aggiuntivi alla flora di Torricchio. La Riserva Naturale di Torricchio 7: 3–13.

Bartolucci F, Galasso G, Conti F (2020) Nomenclatural novelties and typification of names in Scorzonera sensu lato (Asteraceae, Cichorieae) for the Italian vascular flora. Phytotaxa 437(5): 279–290. http://dx.doi.org/10.11646/phytotaxa.437.5.2

Bartolucci F, Peruzzi L, Galasso G, Albano A, Alessandrini A, Ardenghi NMG, Astuti G, Bacchetta G, Ballelli S, Banfi E, Barberis G, Bernardo L, Bouvet D, Bovio M, Cecchi L, Di Pietro R, Domina G, Fascetti S, Fenu G, Festi F, Foggi B, Gallo L, Gottschlich G, Gubellini L, Iamonico D, Iberite M, Jiménez-Mejías P, Lattanzi E, Marchetti D, Martinetto E, Masin RR, Medagli P, Passalacqua NG, Peccenini S, Pennesi R, Pierini B, Poldini L, Prosser F, Raimondo FM, Roma-Marzio F, Rosati L, Santangelo A, Scoppola A, Scortegagna S, Selvaggi A, Selvi F, Soldano A, Stinca A, Wagensommer RP, Wilhalm T, Conti F (2018) An updated checklist of the vascular flora native to Italy. Plant Biosystems 152(2): 179–303. https://doi.org/10.1080/11263504.2017.1419996

Cianfaglione K, Pedrotti F (2019) The Red Beech at the “Montagna di Torricchio”, Marche Region, Central Italy. Notulae Botanicae Horti Agrobotanici Cluj-Napoca 47: 860–866. https://doi.org/10.15835/nbha47311583

Conti F, Proietti E, Ogwu MC, Gubellini L, Bartolucci F (2019) Re-evaluation of *Senecio apenninus* (Asteraceae, Senecioneae). Willdenowia 49: 329–341.

Galasso G, Conti F, Peruzzi L, Ardenghi NMG, Banfi E, Celesti-Grapow L, Albano A, Alessandrini A, Bacchetta G, Ballelli S, Bandini Mazzanti M, Barberis G, Bernardo L, Blasi C, Bouvet D, Bovio M, Cecchi L, Del Guacchio E, Domina G, Fascetti S, Gallo L, Gubellini L, Guiggi A, Iamonico D, Iberite M, Jiménez-Mejías P, Lattanzi E, Marchetti D, Martinetto E, Masin RR, Medagli P, Passalacqua NG, Peccenini S, Pennesi R, Pierini B, Podda L, Poldini L, Prosser F, Raimondo FM, Roma-Marzio F, Rosati L, Santangelo A, Scoppola A, Scortegagna S, Selvaggi A, Selvi F, Soldano A, Stinca A, Wagensommer RP, Wilhalm T, Bartolucci F (2018) An updated checklist of the vascular flora alien to Italy. Plant Biosystems 152(3): 556–592. https://doi.org/10.1080/11263504.2018.1441197

Orsenigo S, Fenu G, Gargano D, Montagnani C, Abeli T, Alessandrini A, Bacchetta G, Bartolucci F, Bovio M, Brullo C, Brullo S, Carta A, Castello M, Cogoni D, Conti F, Domina G, Foggi B, Gennai M, Gigante D, Iberite M, Lasen C, Magrini S, Perrino EV, Prosser F, Santangelo A, Selvaggi A, Stinca A, Vagge I, Villani M, Wagensommer RP, Wilhalm T, Tartaglini N, Duprè E, Blasi C, Rossi G (2020) Red list of threatened vascular plants in Italy. Plant Biosystems. http://dx.doi.org/10.1080/11263504.2020.1739165

Orsenigo S, Montagnani C, Fenu G, Gargano D, Peruzzi L, Abeli T, Alessandrini A, Bacchetta G, Bartolucci F, Bovio M, Brullo C, Brullo S, Carta A, Castello M, Cogoni D, Conti F, Domina G, Foggi B, Gennai M, Gigante D, Iberite M, Lasen C, Magrini S, Perrino EV, Prosser F, Santangelo A, Selvaggi A, Stinca A, Vagge I, Villani MC, Wagensommer RP, Wilhalm T, Tartaglini N, Duprè E, Blasi C, Rossi G (2018) Red Listing plants under full national responsibility: extinction risks and threats in the vascular flora endemic to Italy. Biological Conservation 224: 213–222. https://doi.org/10.1016/j.biocon.2018.05.030

Peruzzi L, Conti F, Bartolucci F (2014) An inventory of vascular plants endemic to Italy. Phytotaxa 168: 1–75. https://doi.org/10.11646/phytotaxa.168.1.1

Peruzzi L, Domina G, Bartolucci F, Galasso G, Peccenini S, Raimondo FM, Albano A, Ales-sandrini A, Banfi E, Barberis G, Bernardo L, Bovio M, Brullo S, Brundu G, Brunu A, Camarda I, Conti F, Croce A, Iamonico D, Iberite M, Iiriti G, Longo D, Manca A, Marsili S, Medagli P, Pistarino A, Salmeri C, Santangelo A, Scassellati E, Selvi F, Soldano A, Stinca A, Vacca G, Villani MC, Wagensommer RP, Passalacqua NG (2015) An inventory of the names of vascular plants endemic to Italy, their loci classici and types. Phytotaxa 196: 1–217. https://doi.org/10.11646/phytotaxa.196.1.1

Pignatti S, Guarino R, La Rosa M (2017a) Flora d’Italia. Ed. 2, Vol. 1. Edagricole, Bologna, 1064 pp.

Pignatti S, Guarino R, La Rosa M (2017b) Flora d’Italia. Ed. 2, Vol. 2. Edagricole, Bologna, 1178 pp.

Rossi G, Montagnani C, Gargano D, Peruzzi L, Abeli T, Ravera S, Cogoni A, Fenu G, Magrini S, Gennai M, Foggi B, Wagensommer RP, Venturella G, Blasi C, Raimondo FM, Orsenigo S (2013) Lista Rossa della Flora Italiana. 1. Policy Species e altre specie minacciate. Comitato Italiano IUCN e Ministero dell'Ambiente e della Tutela del Territorio e del Mare Available at http://www.iucn.it/pdf/Comitato_IUCN_Lista_Rossa_della_flora_italiana_policy_species.pdf.
